# Supplementary material for: Metabolic signatures underlying the liver-eye axis: a large cohort study
Source: Research Square preprint supplement (doi:10.21203/rs.3.rs-6527748/v1), 2025-07-02
Supplement: Supplementary file 1 [file b38d9d35c93512c532521cad.docx]

Metabolic signatures underlying the liver-eye axis: A large cohort study

[Supplemental results 2](#_Toc194589086)

[Table S1. Associations of liver function with retinal layer thickness in analytic sample 2 2](#_Toc194589087)

[Table S2. Significant metabolites associated with liver function 6](#_Toc194589088)

[Table S3. Weights of the biomarkers included in the metabolic signature 20](#_Toc194589089)

[Table S4. Associations of liver function with metabolic signature and metabolites 22](#_Toc194589090)

[Table S5. Associations of retinal layer thickness with metabolic signature and metabolites 24](#_Toc194589091)

[Table S6. Mediation proportion of single metabolite in the association of liver function with ISOSRPE 27](#_Toc194589092)

[Table S7. Mediation proportion of signal metabolite in the association of liver function with RPE 32](#_Toc194589093)

[Table S8. Associations of liver function and retinal layer thickness in the sex and age subgroup in analytic sample 1 37](#_Toc194589094)

[Table S9. Associations of liver function with retinal layer thickness after excluding liver disease in analytic sample 1 39](#_Toc194589095)

[Table S10. Associations of liver function with retinal layer thickness in analytic sample 1 42](#_Toc194589096)

[Table S11. Mediation proportion of metabolic signature in the association of liver function with ISOSRPE in the age and sex subgroup 44](#_Toc194589097)

[Table S12. Mediation proportion of metabolic signature in the association of liver function with RNFL 45](#_Toc194589098)

[Table S13. Mediation proportion of signal metabolic in the association of liver function with RNFL 46](#_Toc194589099)

[Table S14. Mediation proportion of metabolic signature in the association of liver function with RNFL in the age and sex subgroup 50](#_Toc194589100)

# Supplemental results

## Table S1. Associations of liver function with retinal layer thickness in analytic sample 2

| **Retinal layer thickness** | **Model 1a** |  | **Model 2** |  | **Model 3** |  |
| --- | --- | --- | --- | --- | --- | --- |
|  | **β** (**SE**) | ***P*-valueb** | **β** (**SE**) | ***P*-value** | **β** (**SE**) | ***P*-value** |
| **Liver function** |  |  |  |  |  |  |
| ELMISOS | **-0.066 (0.023)** | **0.009** | -0.031 (0.023) | 0.300 | -0.029 (0.023) | 0.304 |
| INLELM | -0.202 (0.099) | 0.056 | -0.11 (0.099) | 0.300 | -0.086 (0.1) | 0.454 |
| RPE | **0.107 (0.045)** | **0.032** | 0.096 (0.046) | 0.084 | 0.102 (0.046) | 0.065 |
| ISOSRPE | **-0.278 (0.062)** | **0.000** | **-0.158 (0.063)** | **0.042** | **-0.167 (0.063)** | **0.042** |
| GCIPL | -0.148 (0.085) | 0.096 | -0.089 (0.086) | 0.300 | -0.06 (0.087) | 0.494 |
| INL | 0.038 (0.036) | 0.299 | 0.039 (0.037) | 0.300 | 0.05 (0.037) | 0.304 |
| RNFL | **-0.253 (0.067)** | **0.000** | **-0.171 (0.067)** | **0.042** | **-0.172 (0.068)** | **0.042** |
| **ALT** |  |  |  |  |  |  |
| ELMISOS | -0.128 (0.055) | 0.154 | -0.074 (0.056) | 0.885 | -0.074 (0.056) | 0.829 |
| INLELM | 0.018 (0.239) | 0.941 | 0.068 (0.238) | 0.885 | 0.052 (0.242) | 0.829 |
| RPE | -0.039 (0.11) | 0.842 | -0.03 (0.11) | 0.885 | -0.047 (0.112) | 0.829 |
| ISOSRPE | -0.237 (0.151) | 0.406 | -0.079 (0.151) | 0.885 | -0.11 (0.153) | 0.829 |
| GCIPL | -0.222 (0.207) | 0.621 | -0.144 (0.208) | 0.885 | -0.143 (0.211) | 0.829 |
| INL | 0.037 (0.088) | 0.842 | 0.013 (0.088) | 0.885 | 0.026 (0.09) | 0.829 |
| RNFL | -0.15 (0.162) | 0.621 | -0.046 (0.162) | 0.885 | -0.053 (0.165) | 0.829 |
| **AST** |  |  |  |  |  |  |
| ELMISOS | **-0.146 (0.047)** | **0.014** | -0.111 (0.047) | 0.095 | -0.1 (0.048) | 0.123 |
| INLELM | 0.072 (0.202) | 0.721 | 0.164 (0.201) | 0.726 | 0.225 (0.204) | 0.474 |
| RPE | 0.039 (0.093) | 0.721 | 0.026 (0.093) | 0.914 | 0.031 (0.095) | 0.868 |
| ISOSRPE | -0.11 (0.128) | 0.681 | 0.01 (0.128) | 0.935 | -0.005 (0.129) | 0.968 |
| GCIPL | -0.393 (0.175) | 0.058 | -0.324 (0.176) | 0.154 | -0.288 (0.178) | 0.247 |
| INL | 0.048 (0.074) | 0.721 | 0.045 (0.074) | 0.760 | 0.062 (0.076) | 0.578 |
| RNFL | **-0.385 (0.137)** | **0.018** | -0.302 (0.137) | 0.095 | -0.300 (0.139) | 0.123 |
| **TBIL** |  |  |  |  |  |  |
| ELMISOS | 0.036 (0.034) | 0.506 | 0.047 (0.034) | 0.347 | 0.045 (0.035) | 0.439 |
| INLELM | -0.246 (0.148) | 0.333 | -0.201 (0.147) | 0.347 | -0.171 (0.149) | 0.439 |
| RPE | 0.092 (0.068) | 0.411 | 0.088 (0.068) | 0.347 | 0.089 (0.069) | 0.439 |
| ISOSRPE | -0.171 (0.094) | 0.333 | -0.127 (0.093) | 0.347 | -0.133 (0.094) | 0.439 |
| GCIPL | -0.071 (0.128) | 0.674 | -0.048 (0.128) | 0.827 | -0.014 (0.13) | 0.940 |
| INL | 0.038 (0.054) | 0.674 | 0.042 (0.054) | 0.612 | 0.044 (0.055) | 0.602 |
| RNFL | -0.033 (0.1) | 0.745 | -0.001 (0.1) | 0.994 | 0.008 (0.101) | 0.940 |
| **GGT** |  |  |  |  |  |  |
| ELMISOS | **-0.155 (0.037)** | **0.000** | **-0.111 (0.037)** | **0.011** | **-0.123 (0.038)** | **0.007** |
| INLELM | -0.155 (0.159) | 0.386 | -0.073 (0.159) | 0.676 | -0.081 (0.162) | 0.615 |
| RPE | 0.158 (0.073) | 0.052 | 0.154 (0.074) | 0.084 | 0.17 (0.075) | 0.054 |
| ISOSRPE | -0.210 (0.101) | 0.052 | -0.076 (0.101) | 0.633 | -0.08 (0.102) | 0.568 |
| GCIPL | -0.332 (0.138) | **0.037** | -0.26 (0.139) | 0.107 | -0.216 (0.141) | 0.219 |
| INL | 0.03 (0.059) | 0.609 | 0.025 (0.059) | 0.676 | 0.042 (0.06) | 0.568 |
| RNFL | -0.45 (0.108) | **0.000** | **-0.358 (0.108)** | **0.007** | **-0.326 (0.11)** | **0.011** |
| **ALP** |  |  |  |  |  |  |
| ELMISOS | -0.101 (0.03) | **0.004** | -0.063 (0.031) | 0.168 | -0.061 (0.031) | 0.165 |
| INLELM | -0.296 (0.131) | 0.053 | -0.181 (0.131) | 0.292 | -0.146 (0.133) | 0.379 |
| RPE | 0.045 (0.06) | 0.534 | 0.024 (0.061) | 0.788 | 0.035 (0.061) | 0.602 |
| ISOSRPE | **-0.307 (0.083)** | **0.000** | -0.164 (0.083) | 0.168 | -0.173 (0.084) | 0.165 |
| GCIPL | -0.032 (0.114) | 0.777 | 0.031 (0.114) | 0.788 | 0.06 (0.116) | 0.602 |
| INL | 0.074 (0.048) | 0.172 | 0.078 (0.048) | 0.247 | 0.086 (0.049) | 0.189 |
| RNFL | -0.193 (0.089) | 0.053 | -0.096 (0.089) | 0.395 | -0.115 (0.09) | 0.359 |
| **TP** |  |  |  |  |  |  |
| ELMISOS | 0.199 (0.119) | 0.326 | 0.226 (0.118) | 0.196 | 0.232 (0.119) | 0.182 |
| INLELM | -0.224 (0.511) | 0.837 | -0.159 (0.507) | 0.754 | -0.143 (0.514) | 0.860 |
| RPE | 0.068 (0.235) | 0.837 | 0.083 (0.235) | 0.754 | 0.103 (0.238) | 0.860 |
| ISOSRPE | -0.785 (0.324) | 0.105 | -0.718 (0.321) | 0.182 | -0.703 (0.324) | 0.182 |
| GCIPL | 0.091 (0.443) | 0.837 | 0.166 (0.443) | 0.754 | 0.079 (0.448) | 0.860 |
| INL | -0.168 (0.188) | 0.761 | -0.168 (0.187) | 0.648 | -0.175 (0.190) | 0.746 |
| RNFL | 0.270 (0.346) | 0.761 | 0.324 (0.345) | 0.648 | 0.279 (0.350) | 0.746 |
| **ALB** |  |  |  |  |  |  |
| ELMISOS | -0.169 (0.453) | 0.974 | -0.161 (0.452) | 0.968 | -0.16 (0.450) | 0.979 |
| INLELM | 0.407 (1.949) | 0.974 | 0.393 (1.934) | 0.968 | 0.394 (1.934) | 0.979 |
| RPE | -0.714 (0.899) | 0.974 | -0.579 (0.896) | 0.968 | -0.547 (0.894) | 0.979 |
| ISOSRPE | -0.265 (1.235) | 0.974 | -0.255 (1.227) | 0.968 | -0.277 (1.220) | 0.979 |
| GCIPL | -1.821 (1.691) | 0.974 | -1.726 (1.689) | 0.968 | -1.621 (1.685) | 0.979 |
| INL | 0.004 (0.717) | 0.995 | -0.029 (0.715) | 0.968 | -0.014 (0.716) | 0.984 |
| RNFL | -1.46 (1.32) | 0.974 | -1.483 (1.316) | 0.968 | -1.433 (1.317) | 0.979 |

Notes: The coefficient of linear regression, Beta (*β*); Standard Error (SE) ; alanine transaminase (ALT), Aspartate transaminase (AST), Total bilirubin (TBIL), Gamma glutamyltransferase (GGT), Alkaline phosphatase (ALP), Total Protein (TP), Albumin (ALB); retinal nerve fiber layer (RNFL), ganglion cell-inner plexiform layer (GCIPL), inner nuclear layer (INL), inner nuclear layer-external limiting membrane (INLELM), external limiting membrane-inner and outer photoreceptor segments (ELMISOS), inner and outer photoreceptor segments-retinal pigment epithelium (ISOS-RPE), and retinal pigment epithelium (RPE);

a Model 1 was adjusted for age and sex;

Model 2 was further adjusted for Townsend deprivation index, ethnic, current employment status, smoking status, drinking status, BMI, regular exercise;

Model 3 was further adjusted for best-corrected visual acuity (BCVA), intraocular pressure (IOP).

b Red font represents p-values less than 0.05,red bold font represents p-values adjusted by the Benjamini-Hochberg procedure less than 0.05.

## Table S2. Significant metabolites associated with liver function

| **Field_id** | **Metabolites** | **β** (**SE**) | ***P*- value** |
| --- | --- | --- | --- |
| n_23400_0_0 | Total Cholesterol | -0.014 (0.015) | 0.395 |
| n_23401_0_0 | Total Cholesterol Minus HDL-C | 0.031 (0.016) | 0.056 |
| n_23402_0_0 | Remnant Cholesterol (Non-HDL, Non-LDL -Cholesterol) | 0.068 (0.016) | 0.000 |
| n_23403_0_0 | VLDL Cholesterol | 0.147 (0.016) | 0.000 |
| n_23404_0_0 | Clinical LDL Cholesterol | -0.026 (0.016) | 0.113 |
| n_23405_0_0 | LDL Cholesterol | -0.005 (0.016) | 0.747 |
| n_23406_0_0 | HDL Cholesterol | -0.119 (0.014) | 0.000 |
| n_23407_0_0 | Total Triglycerides | 0.252 (0.015) | 0.000 |
| n_23408_0_0 | Triglycerides in VLDL | 0.239 (0.015) | 0.000 |
| n_23409_0_0 | Triglycerides in LDL | 0.255 (0.015) | 0.000 |
| n_23410_0_0 | Triglycerides in HDL | 0.27 (0.015) | 0.000 |
| n_23411_0_0 | Total Phospholipids in Lipoprotein Particles | 0.07 (0.015) | 0.000 |
| n_23412_0_0 | Phospholipids in VLDL | 0.206 (0.015) | 0.000 |
| n_23413_0_0 | Phospholipids in LDL | 0.006 (0.016) | 0.739 |
| n_23414_0_0 | Phospholipids in HDL | -0.016 (0.014) | 0.276 |
| n_23415_0_0 | Total Esterified Cholesterol | -0.026 (0.015) | 0.094 |
| n_23416_0_0 | Cholesteryl Esters in VLDL | 0.118 (0.016) | 0.000 |
| n_23417_0_0 | Cholesteryl Esters in LDL | 0.017 (0.016) | 0.291 |
| n_23418_0_0 | Cholesteryl Esters in HDL | -0.132 (0.014) | 0.000 |
| n_23419_0_0 | Total Free Cholesterol | 0.019 (0.015) | 0.237 |
| n_23420_0_0 | Free Cholesterol in VLDL | 0.179 (0.015) | 0.000 |
| n_23421_0_0 | Free Cholesterol in LDL | -0.066 (0.016) | 0.000 |
| n_23422_0_0 | Free Cholesterol in HDL | -0.068 (0.014) | 0.000 |
| n_23423_0_0 | Total Lipids in Lipoprotein Particles | 0.101 (0.015) | 0.000 |
| n_23424_0_0 | Total Lipids in VLDL | 0.22 (0.015) | 0.000 |
| n_23425_0_0 | Total Lipids in LDL | 0.015 (0.016) | 0.359 |
| n_23426_0_0 | Total Lipids in HDL | -0.048 (0.014) | 0.001 |
| n_23427_0_0 | Total Concentration of Lipoprotein Particles | -0.026 (0.015) | 0.094 |
| n_23428_0_0 | Concentration of VLDL Particles | 0.178 (0.015) | 0.000 |
| n_23429_0_0 | Concentration of LDL Particles | 0.04 (0.016) | 0.014 |
| n_23430_0_0 | Concentration of HDL Particles | -0.036 (0.015) | 0.022 |
| n_23431_0_0 | Average Diameter for VLDL Particles | 0.186 (0.015) | 0.000 |
| n_23432_0_0 | Average Diameter for LDL Particles | -0.096 (0.015) | 0.000 |
| n_23433_0_0 | Average Diameter for HDL Particles | -0.11 (0.014) | 0.000 |
| n_23434_0_0 | Phosphoglycerides | 0.086 (0.015) | 0.000 |
| n_23435_0_0 | Triglycerides to Phosphoglycerides ratio | 0.23 (0.014) | 0.000 |
| n_23436_0_0 | Total Cholines | 0.055 (0.015) | 0.000 |
| n_23437_0_0 | Phosphatidylcholines | 0.061 (0.015) | 0.000 |
| n_23438_0_0 | Sphingomyelins | -0.015 (0.015) | 0.342 |
| n_23439_0_0 | Apolipoprotein B | 0.053 (0.016) | 0.001 |
| n_23440_0_0 | Apolipoprotein A1 | -0.031 (0.015) | 0.038 |
| n_23441_0_0 | Apolipoprotein B to Apolipoprotein A1 ratio | 0.061 (0.015) | 0.000 |
| n_23442_0_0 | Total Fatty Acids | 0.209 (0.015) | 0.000 |
| n_23443_0_0 | Degree of Unsaturation | -0.235 (0.015) | 0.000 |
| n_23444_0_0 | Omega-3 Fatty Acids | 0.02 (0.015) | 0.216 |
| n_23445_0_0 | Omega-6 Fatty Acids | 0.075 (0.015) | 0.000 |
| n_23446_0_0 | Polyunsaturated Fatty Acids | 0.069 (0.015) | 0.000 |
| n_23447_0_0 | Monounsaturated Fatty Acids | 0.277 (0.015) | 0.000 |
| n_23448_0_0 | Saturated Fatty Acids | 0.227 (0.015) | 0.000 |
| n_23449_0_0 | Linoleic Acid | 0.058 (0.015) | 0.000 |
| n_23450_0_0 | Docosahexaenoic Acid | -0.085 (0.015) | 0.000 |
| n_23451_0_0 | Omega-3 Fatty Acids to Total Fatty Acids percentage | -0.091 (0.016) | 0.000 |
| n_23452_0_0 | Omega-6 Fatty Acids to Total Fatty Acids percentage | -0.282 (0.015) | 0.000 |
| n_23453_0_0 | Polyunsaturated Fatty Acids to Total Fatty Acids percentage | -0.309 (0.014) | 0.000 |
| n_23454_0_0 | Monounsaturated Fatty Acids to Total Fatty Acids percentage | 0.311 (0.015) | 0.000 |
| n_23455_0_0 | Saturated Fatty Acids to Total Fatty Acids percentage | 0.17 (0.015) | 0.000 |
| n_23456_0_0 | Linoleic Acid to Total Fatty Acids percentage | -0.23 (0.015) | 0.000 |
| n_23457_0_0 | Docosahexaenoic Acid to Total Fatty Acids percentage | -0.192 (0.015) | 0.000 |
| n_23458_0_0 | Polyunsaturated Fatty Acids to Monounsaturated Fatty Acids ratio | -0.312 (0.015) | 0.000 |
| n_23459_0_0 | Omega-6 Fatty Acids to Omega-3 Fatty Acids ratio | 0.008 (0.015) | 0.598 |
| n_23460_0_0 | Alanine | 0.125 (0.016) | 0.000 |
| n_23461_0_0 | Glutamine | -0.104 (0.016) | 0.000 |
| n_23462_0_0 | Glycine | -0.098 (0.015) | 0.000 |
| n_23463_0_0 | Histidine | -0.033 (0.015) | 0.038 |
| n_23464_0_0 | Total Concentration of Branched-Chain Amino Acids (Leucine + Isoleucine + Valine) | 0.123 (0.014) | 0.000 |
| n_23465_0_0 | Isoleucine | 0.118 (0.014) | 0.000 |
| n_23466_0_0 | Leucine | 0.094 (0.014) | 0.000 |
| n_23467_0_0 | Valine | 0.135 (0.015) | 0.000 |
| n_23468_0_0 | Phenylalanine | 0.108 (0.014) | 0.000 |
| n_23469_0_0 | Tyrosine | 0.183 (0.014) | 0.000 |
| n_23470_0_0 | Glucose | 0.087 (0.012) | 0.000 |
| n_23471_0_0 | Lactate | 0.069 (0.018) | 0.000 |
| n_23472_0_0 | Pyruvate | -0.046 (0.02) | 0.025 |
| n_23473_0_0 | Citrate | 0.016 (0.016) | 0.314 |
| n_23474_0_0 | 3-Hydroxybutyrate | -0.024 (0.015) | 0.125 |
| n_23475_0_0 | Acetate | 0.024 (0.011) | 0.028 |
| n_23476_0_0 | Acetoacetate | 0.034 (0.014) | 0.018 |
| n_23477_0_0 | Acetone | -0.038 (0.016) | 0.023 |
| n_23478_0_0 | Creatinine | 0.054 (0.013) | 0.000 |
| n_23479_0_0 | Albumin | -0.115 (0.016) | 0.000 |
| n_23480_0_0 | Glycoprotein Acetyls | 0.349 (0.015) | 0.000 |
| n_23481_0_0 | Concentration of Chylomicrons and Extremely Large VLDL Particles | 0.261 (0.014) | 0.000 |
| n_23482_0_0 | Total Lipids in Chylomicrons and Extremely Large VLDL | 0.256 (0.014) | 0.000 |
| n_23483_0_0 | Phospholipids in Chylomicrons and Extremely Large VLDL | 0.263 (0.015) | 0.000 |
| n_23484_0_0 | Cholesterol in Chylomicrons and Extremely Large VLDL | 0.259 (0.015) | 0.000 |
| n_23485_0_0 | Cholesteryl Esters in Chylomicrons and Extremely Large VLDL | 0.256 (0.015) | 0.000 |
| n_23486_0_0 | Free Cholesterol in Chylomicrons and Extremely Large VLDL | 0.259 (0.015) | 0.000 |
| n_23487_0_0 | Triglycerides in Chylomicrons and Extremely Large VLDL | 0.25 (0.014) | 0.000 |
| n_23488_0_0 | Concentration of Very Large VLDL Particles | 0.242 (0.015) | 0.000 |
| n_23489_0_0 | Total Lipids in Very Large VLDL | 0.241 (0.015) | 0.000 |
| n_23490_0_0 | Phospholipids in Very Large VLDL | 0.239 (0.015) | 0.000 |
| n_23491_0_0 | Cholesterol in Very Large VLDL | 0.212 (0.015) | 0.000 |
| n_23492_0_0 | Cholesteryl Esters in Very Large VLDL | 0.185 (0.015) | 0.000 |
| n_23493_0_0 | Free Cholesterol in Very Large VLDL | 0.232 (0.015) | 0.000 |
| n_23494_0_0 | Triglycerides in Very Large VLDL | 0.245 (0.014) | 0.000 |
| n_23495_0_0 | Concentration of Large VLDL Particles | 0.222 (0.015) | 0.000 |
| n_23496_0_0 | Total Lipids in Large VLDL | 0.212 (0.015) | 0.000 |
| n_23497_0_0 | Phospholipids in Large VLDL | 0.229 (0.015) | 0.000 |
| n_23498_0_0 | Cholesterol in Large VLDL | 0.197 (0.015) | 0.000 |
| n_23499_0_0 | Cholesteryl Esters in Large VLDL | 0.17 (0.015) | 0.000 |
| n_23500_0_0 | Free Cholesterol in Large VLDL | 0.217 (0.015) | 0.000 |
| n_23501_0_0 | Triglycerides in Large VLDL | 0.206 (0.015) | 0.000 |
| n_23502_0_0 | Concentration of Medium VLDL Particles | 0.117 (0.016) | 0.000 |
| n_23503_0_0 | Total Lipids in Medium VLDL | 0.144 (0.015) | 0.000 |
| n_23504_0_0 | Phospholipids in Medium VLDL | 0.114 (0.016) | 0.000 |
| n_23505_0_0 | Cholesterol in Medium VLDL | 0.013 (0.016) | 0.433 |
| n_23506_0_0 | Cholesteryl Esters in Medium VLDL | -0.04 (0.015) | 0.012 |
| n_23507_0_0 | Free Cholesterol in Medium VLDL | 0.08 (0.016) | 0.000 |
| n_23508_0_0 | Triglycerides in Medium VLDL | 0.199 (0.015) | 0.000 |
| n_23509_0_0 | Concentration of Small VLDL Particles | 0.187 (0.015) | 0.000 |
| n_23510_0_0 | Total Lipids in Small VLDL | 0.184 (0.015) | 0.000 |
| n_23511_0_0 | Phospholipids in Small VLDL | 0.128 (0.016) | 0.000 |
| n_23512_0_0 | Cholesterol in Small VLDL | 0.113 (0.016) | 0.000 |
| n_23513_0_0 | Cholesteryl Esters in Small VLDL | 0.134 (0.016) | 0.000 |
| n_23514_0_0 | Free Cholesterol in Small VLDL | 0.075 (0.016) | 0.000 |
| n_23515_0_0 | Triglycerides in Small VLDL | 0.236 (0.015) | 0.000 |
| n_23516_0_0 | Concentration of Very Small VLDL Particles | 0.137 (0.015) | 0.000 |
| n_23517_0_0 | Total Lipids in Very Small VLDL | 0.15 (0.015) | 0.000 |
| n_23518_0_0 | Phospholipids in Very Small VLDL | 0.168 (0.015) | 0.000 |
| n_23519_0_0 | Cholesterol in Very Small VLDL | 0.06 (0.015) | 0.000 |
| n_23520_0_0 | Cholesteryl Esters in Very Small VLDL | 0.035 (0.015) | 0.024 |
| n_23521_0_0 | Free Cholesterol in Very Small VLDL | 0.117 (0.015) | 0.000 |
| n_23522_0_0 | Triglycerides in Very Small VLDL | 0.269 (0.015) | 0.000 |
| n_23523_0_0 | Concentration of IDL Particles | 0.02 (0.015) | 0.217 |
| n_23524_0_0 | Total Lipids in IDL | -0.003 (0.015) | 0.873 |
| n_23525_0_0 | Phospholipids in IDL | 0.003 (0.015) | 0.837 |
| n_23526_0_0 | Cholesterol in IDL | -0.036 (0.015) | 0.019 |
| n_23527_0_0 | Cholesteryl Esters in IDL | -0.033 (0.015) | 0.037 |
| n_23528_0_0 | Free Cholesterol in IDL | -0.047 (0.015) | 0.003 |
| n_23529_0_0 | Triglycerides in IDL | 0.259 (0.015) | 0.000 |
| n_23530_0_0 | Concentration of Large LDL Particles | 0.026 (0.016) | 0.109 |
| n_23531_0_0 | Total Lipids in Large LDL | -0.006 (0.016) | 0.699 |
| n_23532_0_0 | Phospholipids in Large LDL | -0.013 (0.016) | 0.412 |
| n_23533_0_0 | Cholesterol in Large LDL | -0.027 (0.016) | 0.092 |
| n_23534_0_0 | Cholesteryl Esters in Large LDL | -0.012 (0.016) | 0.465 |
| n_23535_0_0 | Free Cholesterol in Large LDL | -0.068 (0.016) | 0.000 |
| n_23536_0_0 | Triglycerides in Large LDL | 0.25 (0.015) | 0.000 |
| n_23537_0_0 | Concentration of Medium LDL Particles | 0.056 (0.016) | 0.000 |
| n_23538_0_0 | Total Lipids in Medium LDL | 0.052 (0.016) | 0.001 |
| n_23539_0_0 | Phospholipids in Medium LDL | 0.04 (0.016) | 0.015 |
| n_23540_0_0 | Cholesterol in Medium LDL | 0.036 (0.016) | 0.026 |
| n_23541_0_0 | Cholesteryl Esters in Medium LDL | 0.067 (0.016) | 0.000 |
| n_23542_0_0 | Free Cholesterol in Medium LDL | -0.05 (0.016) | 0.003 |
| n_23543_0_0 | Triglycerides in Medium LDL | 0.251 (0.015) | 0.000 |
| n_23544_0_0 | Concentration of Small LDL Particles | 0.066 (0.016) | 0.000 |
| n_23545_0_0 | Total Lipids in Small LDL | 0.044 (0.016) | 0.006 |
| n_23546_0_0 | Phospholipids in Small LDL | 0.010 (0.016) | 0.527 |
| n_23547_0_0 | Cholesterol in Small LDL | 0.027 (0.016) | 0.102 |
| n_23548_0_0 | Cholesteryl Esters in Small LDL | 0.067 (0.016) | 0.000 |
| n_23549_0_0 | Free Cholesterol in Small LDL | -0.083 (0.016) | 0.000 |
| n_23550_0_0 | Triglycerides in Small LDL | 0.258 (0.015) | 0.000 |
| n_23551_0_0 | Concentration of Very Large HDL Particles | -0.108 (0.015) | 0.000 |
| n_23552_0_0 | Total Lipids in Very Large HDL | -0.121 (0.014) | 0.000 |
| n_23553_0_0 | Phospholipids in Very Large HDL | -0.115 (0.015) | 0.000 |
| n_23554_0_0 | Cholesterol in Very Large HDL | -0.146 (0.014) | 0.000 |
| n_23555_0_0 | Cholesteryl Esters in Very Large HDL | -0.153 (0.014) | 0.000 |
| n_23556_0_0 | Free Cholesterol in Very Large HDL | -0.116 (0.015) | 0.000 |
| n_23557_0_0 | Triglycerides in Very Large HDL | 0.206 (0.015) | 0.000 |
| n_23558_0_0 | Concentration of Large HDL Particles | -0.13 (0.014) | 0.000 |
| n_23559_0_0 | Total Lipids in Large HDL | -0.122 (0.014) | 0.000 |
| n_23560_0_0 | Phospholipids in Large HDL | -0.104 (0.014) | 0.000 |
| n_23561_0_0 | Cholesterol in Large HDL | -0.153 (0.014) | 0.000 |
| n_23562_0_0 | Cholesteryl Esters in Large HDL | -0.162 (0.014) | 0.000 |
| n_23563_0_0 | Free Cholesterol in Large HDL | -0.121 (0.014) | 0.000 |
| n_23564_0_0 | Triglycerides in Large HDL | 0.171 (0.015) | 0.000 |
| n_23565_0_0 | Concentration of Medium HDL Particles | -0.028 (0.015) | 0.061 |
| n_23566_0_0 | Total Lipids in Medium HDL | 0.001 (0.015) | 0.965 |
| n_23567_0_0 | Phospholipids in Medium HDL | 0.035 (0.015) | 0.022 |
| n_23568_0_0 | Cholesterol in Medium HDL | -0.07 (0.015) | 0.000 |
| n_23569_0_0 | Cholesteryl Esters in Medium HDL | -0.078 (0.015) | 0.000 |
| n_23570_0_0 | Free Cholesterol in Medium HDL | -0.036 (0.014) | 0.016 |
| n_23571_0_0 | Triglycerides in Medium HDL | 0.273 (0.015) | 0.000 |
| n_23572_0_0 | Concentration of Small HDL Particles | 0.036 (0.016) | 0.026 |
| n_23573_0_0 | Total Lipids in Small HDL | 0.111 (0.016) | 0.000 |
| n_23574_0_0 | Phospholipids in Small HDL | 0.128 (0.016) | 0.000 |
| n_23575_0_0 | Cholesterol in Small HDL | 0.009 (0.016) | 0.581 |
| n_23576_0_0 | Cholesteryl Esters in Small HDL | -0.016 (0.016) | 0.345 |
| n_23577_0_0 | Free Cholesterol in Small HDL | 0.080 (0.016) | 0.000 |
| n_23578_0_0 | Triglycerides in Small HDL | 0.283 (0.015) | 0.000 |
| n_23579_0_0 | Phospholipids to Total Lipids in Chylomicrons and Extremely Large VLDL percentage | 0.106 (0.016) | 0.000 |
| n_23580_0_0 | Cholesterol to Total Lipids in Chylomicrons and Extremely Large VLDL percentage | -0.147 (0.017) | 0.000 |
| n_23581_0_0 | Cholesteryl Esters to Total Lipids in Chylomicrons and Extremely Large VLDL percentage | -0.127 (0.017) | 0.000 |
| n_23582_0_0 | Free Cholesterol to Total Lipids in Chylomicrons and Extremely Large VLDL percentage | -0.151 (0.016) | 0.000 |
| n_23583_0_0 | Triglycerides to Total Lipids in Chylomicrons and Extremely Large VLDL percentage | 0.102 (0.016) | 0.000 |
| n_23584_0_0 | Phospholipids to Total Lipids in Very Large VLDL percentage | 0.083 (0.018) | 0.000 |
| n_23585_0_0 | Cholesterol to Total Lipids in Very Large VLDL percentage | -0.193 (0.016) | 0.000 |
| n_23586_0_0 | Cholesteryl Esters to Total Lipids in Very Large VLDL percentage | -0.197 (0.016) | 0.000 |
| n_23587_0_0 | Free Cholesterol to Total Lipids in Very Large VLDL percentage | -0.125 (0.016) | 0.000 |
| n_23588_0_0 | Triglycerides to Total Lipids in Very Large VLDL percentage | 0.165 (0.016) | 0.000 |
| n_23589_0_0 | Phospholipids to Total Lipids in Large VLDL percentage | 0.177 (0.016) | 0.000 |
| n_23590_0_0 | Cholesterol to Total Lipids in Large VLDL percentage | -0.105 (0.016) | 0.000 |
| n_23591_0_0 | Cholesteryl Esters to Total Lipids in Large VLDL percentage | -0.155 (0.015) | 0.000 |
| n_23592_0_0 | Free Cholesterol to Total Lipids in Large VLDL percentage | 0.058 (0.016) | 0.000 |
| n_23593_0_0 | Triglycerides to Total Lipids in Large VLDL percentage | -0.025 (0.016) | 0.132 |
| n_23594_0_0 | Phospholipids to Total Lipids in Medium VLDL percentage | -0.12 (0.015) | 0.000 |
| n_23595_0_0 | Cholesterol to Total Lipids in Medium VLDL percentage | -0.205 (0.015) | 0.000 |
| n_23596_0_0 | Cholesteryl Esters to Total Lipids in Medium VLDL percentage | -0.213 (0.015) | 0.000 |
| n_23597_0_0 | Free Cholesterol to Total Lipids in Medium VLDL percentage | -0.172 (0.015) | 0.000 |
| n_23598_0_0 | Triglycerides to Total Lipids in Medium VLDL percentage | 0.190 (0.015) | 0.000 |
| n_23599_0_0 | Phospholipids to Total Lipids in Small VLDL percentage | -0.224 (0.015) | 0.000 |
| n_23600_0_0 | Cholesterol to Total Lipids in Small VLDL percentage | -0.171 (0.015) | 0.000 |
| n_23601_0_0 | Cholesteryl Esters to Total Lipids in Small VLDL percentage | -0.109 (0.016) | 0.000 |
| n_23602_0_0 | Free Cholesterol to Total Lipids in Small VLDL percentage | -0.226 (0.015) | 0.000 |
| n_23603_0_0 | Triglycerides to Total Lipids in Small VLDL percentage | 0.191 (0.015) | 0.000 |
| n_23604_0_0 | Phospholipids to Total Lipids in Very Small VLDL percentage | 0.168 (0.016) | 0.000 |
| n_23605_0_0 | Cholesterol to Total Lipids in Very Small VLDL percentage | -0.223 (0.014) | 0.000 |
| n_23606_0_0 | Cholesteryl Esters to Total Lipids in Very Small VLDL percentage | -0.222 (0.014) | 0.000 |
| n_23607_0_0 | Free Cholesterol to Total Lipids in Very Small VLDL percentage | -0.178 (0.015) | 0.000 |
| n_23608_0_0 | Triglycerides to Total Lipids in Very Small VLDL percentage | 0.214 (0.014) | 0.000 |
| n_23609_0_0 | Phospholipids to Total Lipids in IDL percentage | 0.042 (0.016) | 0.009 |
| n_23610_0_0 | Cholesterol to Total Lipids in IDL percentage | -0.218 (0.015) | 0.000 |
| n_23611_0_0 | Cholesteryl Esters to Total Lipids in IDL percentage | -0.178 (0.015) | 0.000 |
| n_23612_0_0 | Free Cholesterol to Total Lipids in IDL percentage | -0.194 (0.015) | 0.000 |
| n_23613_0_0 | Triglycerides to Total Lipids in IDL percentage | 0.246 (0.014) | 0.000 |
| n_23614_0_0 | Phospholipids to Total Lipids in Large LDL percentage | -0.04 (0.016) | 0.014 |
| n_23615_0_0 | Cholesterol to Total Lipids in Large LDL percentage | -0.222 (0.014) | 0.000 |
| n_23616_0_0 | Cholesteryl Esters to Total Lipids in Large LDL percentage | -0.074 (0.015) | 0.000 |
| n_23617_0_0 | Free Cholesterol to Total Lipids in Large LDL percentage | -0.245 (0.014) | 0.000 |
| n_23618_0_0 | Triglycerides to Total Lipids in Large LDL percentage | 0.248 (0.014) | 0.000 |
| n_23619_0_0 | Phospholipids to Total Lipids in Medium LDL percentage | -0.092 (0.016) | 0.000 |
| n_23620_0_0 | Cholesterol to Total Lipids in Medium LDL percentage | -0.181 (0.015) | 0.000 |
| n_23621_0_0 | Cholesteryl Esters to Total Lipids in Medium LDL percentage | 0.115 (0.016) | 0.000 |
| n_23622_0_0 | Free Cholesterol to Total Lipids in Medium LDL percentage | -0.274 (0.015) | 0.000 |
| n_23623_0_0 | Triglycerides to Total Lipids in Medium LDL percentage | 0.242 (0.014) | 0.000 |
| n_23624_0_0 | Phospholipids to Total Lipids in Small LDL percentage | -0.131 (0.016) | 0.000 |
| n_23625_0_0 | Cholesterol to Total Lipids in Small LDL percentage | -0.128 (0.015) | 0.000 |
| n_23626_0_0 | Cholesteryl Esters to Total Lipids in Small LDL percentage | 0.142 (0.016) | 0.000 |
| n_23627_0_0 | Free Cholesterol to Total Lipids in Small LDL percentage | -0.275 (0.015) | 0.000 |
| n_23628_0_0 | Triglycerides to Total Lipids in Small LDL percentage | 0.268 (0.014) | 0.000 |
| n_23629_0_0 | Phospholipids to Total Lipids in Very Large HDL percentage | -0.063 (0.014) | 0.000 |
| n_23630_0_0 | Cholesterol to Total Lipids in Very Large HDL percentage | -0.053 (0.015) | 0.000 |
| n_23631_0_0 | Cholesteryl Esters to Total Lipids in Very Large HDL percentage | -0.164 (0.015) | 0.000 |
| n_23632_0_0 | Free Cholesterol to Total Lipids in Very Large HDL percentage | 0.084 (0.014) | 0.000 |
| n_23633_0_0 | Triglycerides to Total Lipids in Very Large HDL percentage | 0.179 (0.014) | 0.000 |
| n_23634_0_0 | Phospholipids to Total Lipids in Large HDL percentage | 0.214 (0.014) | 0.000 |
| n_23635_0_0 | Cholesterol to Total Lipids in Large HDL percentage | -0.235 (0.014) | 0.000 |
| n_23636_0_0 | Cholesteryl Esters to Total Lipids in Large HDL percentage | -0.256 (0.014) | 0.000 |
| n_23637_0_0 | Free Cholesterol to Total Lipids in Large HDL percentage | -0.064 (0.014) | 0.000 |
| n_23638_0_0 | Triglycerides to Total Lipids in Large HDL percentage | 0.198 (0.014) | 0.000 |
| n_23639_0_0 | Phospholipids to Total Lipids in Medium HDL percentage | 0.255 (0.014) | 0.000 |
| n_23640_0_0 | Cholesterol to Total Lipids in Medium HDL percentage | -0.273 (0.015) | 0.000 |
| n_23641_0_0 | Cholesteryl Esters to Total Lipids in Medium HDL percentage | -0.282 (0.015) | 0.000 |
| n_23642_0_0 | Free Cholesterol to Total Lipids in Medium HDL percentage | -0.118 (0.014) | 0.000 |
| n_23643_0_0 | Triglycerides to Total Lipids in Medium HDL percentage | 0.266 (0.015) | 0.000 |
| n_23644_0_0 | Phospholipids to Total Lipids in Small HDL percentage | 0.133 (0.015) | 0.000 |
| n_23645_0_0 | Cholesterol to Total Lipids in Small HDL percentage | -0.278 (0.015) | 0.000 |
| n_23646_0_0 | Cholesteryl Esters to Total Lipids in Small HDL percentage | -0.259 (0.015) | 0.000 |
| n_23647_0_0 | Free Cholesterol to Total Lipids in Small HDL percentage | -0.068 (0.015) | 0.000 |
| n_23648_0_0 | Triglycerides to Total Lipids in Small HDL percentage | 0.270 (0.015) | 0.000 |

Notes: Model was adjusted for age and sex. P-values were adjusted by the Benjamini-Hochberg procedure.

## Table S3. Weights of the biomarkers included in the metabolic signature

| **Field_id** | **Metabolites** | **β-Weight** |
| --- | --- | --- |
| n_23480_0_0 | Glycoprotein Acetyls | 0.346 |
| n_23469_0_0 | Tyrosine | 0.133 |
| n_23479_0_0 | Albumin | -0.103 |
| n_23443_0_0 | Degree of Unsaturation | -0.102 |
| n_23456_0_0 | Linoleic Acid to Total Fatty Acids percentage | -0.063 |
| n_23461_0_0 | Glutamine | -0.060 |
| n_23620_0_0 | Cholesterol to Total Lipids in Medium LDL percentage | -0.059 |
| n_23431_0_0 | Average Diameter for VLDL Particles | -0.056 |
| n_23472_0_0 | Pyruvate | -0.044 |
| n_23644_0_0 | Phospholipids to Total Lipids in Small HDL percentage | 0.040 |
| n_23616_0_0 | Cholesteryl Esters to Total Lipids in Large LDL percentage | -0.039 |
| n_23462_0_0 | Glycine | -0.037 |
| n_23467_0_0 | Valine | -0.033 |
| n_23582_0_0 | Free Cholesterol to Total Lipids in Chylomicrons and Extremely Large VLDL percentage | -0.030 |
| n_23470_0_0 | Glucose | 0.029 |
| n_23460_0_0 | Alanine | 0.024 |
| n_23518_0_0 | Phospholipids in Very Small VLDL | 0.022 |
| n_23475_0_0 | Acetate | 0.022 |
| n_23454_0_0 | Monounsaturated Fatty Acids to Total Fatty Acids percentage | 0.022 |
| n_23601_0_0 | Cholesteryl Esters to Total Lipids in Small VLDL percentage | 0.021 |
| n_23451_0_0 | Omega-3 Fatty Acids to Total Fatty Acids percentage | -0.013 |
| n_23463_0_0 | Histidine | -0.009 |
| n_23478_0_0 | Creatinine | -0.003 |
| n_23644_0_0 | Phospholipids to Total Lipids in Small HDL percentage | 0.040 |

## Table S4. Associations of liver function with metabolic signature and metabolites

| **Metabolites and metabolite signature** | **Model 1a** |  | **Model 2** |  | **Model 3** |  |
| --- | --- | --- | --- | --- | --- | --- |
|  | **β** (**SE**) | ***P*-valueb** | **β** (**SE**) | ***P*-value** | **β** (**SE**) | ***P*-value** |
| Metabolic signature | 0.497 (0.015) | <0.001 | 0.376 (0.014) | <0.001 | 0.372 (0.014) | <0.001 |
| Average Diameter for VLDL Particles | 0.186 (0.015) | <0.001 | 0.112 (0.014) | <0.001 | 0.11 (0.014) | <0.001 |
| Degree of Unsaturation | -0.235 (0.015) | <0.001 | -0.18 (0.014) | <0.001 | -0.173 (0.014) | <0.001 |
| Omega-3 Fatty Acids to Total Fatty Acids percentage | -0.091 (0.016) | <0.001 | -0.07 (0.015) | <0.001 | -0.064 (0.015) | <0.001 |
| Monounsaturated Fatty Acids to Total Fatty Acids percentage | 0.311 (0.015) | <0.001 | 0.216 (0.014) | <0.001 | 0.214 (0.014) | <0.001 |
| Linoleic Acid to Total Fatty Acids percentage | -0.23 (0.015) | <0.001 | -0.144 (0.014) | <0.001 | -0.148 (0.014) | <0.001 |
| Alanine | 0.125 (0.016) | <0.001 | 0.099 (0.016) | <0.001 | 0.099 (0.016) | <0.001 |
| Glutamine | -0.104 (0.016) | <0.001 | -0.077 (0.016) | <0.001 | -0.077 (0.016) | <0.001 |
| Glycine | -0.098 (0.015) | <0.001 | -0.063 (0.015) | <0.001 | -0.061 (0.015) | <0.001 |
| Histidine | -0.033 (0.015) | 0.033 | -0.025 (0.016) | 0.110 | -0.024 (0.016) | 0.128 |
| Valine | 0.135 (0.015) | <0.001 | 0.079 (0.014) | <0.001 | 0.08 (0.014) | <0.001 |
| Tyrosine | 0.183 (0.014) | <0.001 | 0.139 (0.014) | <0.001 | 0.14 (0.014) | <0.001 |
| Glucose | 0.087 (0.012) | <0.001 | 0.07 (0.012) | <0.001 | 0.065 (0.012) | <0.001 |
| Pyruvate | -0.046 (0.02) | 0.023 | -0.053 (0.02) | 0.010 | -0.051 (0.02) | 0.013 |
| Acetate | 0.024 (0.011) | 0.025 | 0.03 (0.011) | 0.005 | 0.03 (0.011) | 0.006 |
| Creatinine | 0.054 (0.013) | <0.001 | 0.022 (0.013) | 0.095 | 0.02 (0.013) | 0.128 |
| Albumin | -0.115 (0.016) | <0.001 | -0.072 (0.016) | <0.001 | -0.068 (0.016) | <0.001 |
| Glycoprotein Acetyls | 0.349 (0.015) | <0.001 | 0.259 (0.014) | <0.001 | 0.257 (0.014) | <0.001 |
| Phospholipids in Very Small VLDL | 0.168 (0.015) | <0.001 | 0.161 (0.015) | <0.001 | 0.155 (0.015) | <0.001 |
| Free Cholesterol to Total Lipids in Chylomicrons and Extremely Large VLDL percentage | -0.151 (0.016) | <0.001 | -0.12 (0.016) | <0.001 | -0.115 (0.016) | <0.001 |
| Cholesteryl Esters to Total Lipids in Small VLDL percentage | -0.109 (0.016) | <0.001 | -0.08 (0.015) | <0.001 | -0.086 (0.016) | <0.001 |
| Cholesteryl Esters to Total Lipids in Large LDL percentage | -0.074 (0.015) | <0.001 | -0.052 (0.015) | 0.001 | -0.048 (0.015) | 0.001 |
| Cholesterol to Total Lipids in Medium LDL percentage | -0.181 (0.015) | <0.001 | -0.131 (0.014) | <0.001 | -0.134 (0.015) | <0.001 |
| Phospholipids to Total Lipids in Small HDL percentage | 0.133 (0.015) | <0.001 | 0.145 (0.015) | <0.001 | 0.147 (0.015) | <0.001 |

Notes: The coefficient of linear regression, Beta (*β*); Standard Error (SE);

a Model 1 was adjusted for age and sex;

Model 2 was further adjusted for Townsend deprivation index, ethnic, current employment status, smoking status, drinking status, BMI, regular exercise and cholesterol lowering medication;

Model 3 was further adjusted for Aspirin use, Hypertension, Diabetes mellitus, liver disease.

b The P values were further adjusted using the Benjamini-Hochberg procedure.

## Table S5. Associations of retinal layer thickness with metabolic signature and metabolites

| **Metabolites and Metabolite signature** | **Model 1a** |  | **Model 2** |  | **Model 3** |  |
| --- | --- | --- | --- | --- | --- | --- |
|  | **β** (**SE**) | ***P*-valueb** | **β** (**SE**) | ***P*-value** | **β** (**SE**) | ***P*-value** |
| **ISOSRPE** |  |  |  |  |  |  |
| Average Diameter for VLDL Particles | -0.004 (0.002) | 0.066 | 0.002 (0.002) | 0.593 | 0 (0.002) | 0.938 |
| Degree of Unsaturation | 0.004 (0.002) | 0.060 | 0.002 (0.002) | 0.593 | 0.002 (0.002) | 0.424 |
| Omega-3 Fatty Acids to Total Fatty Acids percentage | **0.005 (0.002)** | **0.023** | **0.005 (0.002)** | **0.046** | **0.005 (0.002)** | **0.023** |
| Monounsaturated Fatty Acids to Total Fatty Acids percentage | **-0.012 (0.002)** | **0.000** | **-0.005 (0.002)** | **0.005** | **-0.006 (0.002)** | **0.000** |
| Linoleic Acid to Total Fatty Acids percentage | **0.005 (0.002)** | **0.008** | -0.001 (0.002) | 0.815 | -0.001 (0.002) | 0.877 |
| Alanine | -0.002 (0.002) | 0.556 | 0.001 (0.002) | 0.815 | 0.001 (0.002) | 0.912 |
| Glutamine | -0.001 (0.002) | 0.573 | -0.004 (0.002) | 0.112 | -0.003 (0.002) | 0.314 |
| Glycine | 0.002 (0.002) | 0.223 | -0.001 (0.002) | 0.815 | 0 (0.002) | 0.938 |
| Histidine | 0.001 (0.002) | 0.709 | 0 (0.002) | 0.878 | 0 (0.002) | 0.956 |
| Valine | **-0.009 (0.002)** | **0.000** | **-0.004 (0.002)** | **0.039** | **-0.004 (0.002)** | **0.035** |
| Tyrosine | **-0.004 (0.002)** | **0.025** | 0 (0.002) | 0.878 | 0 (0.002) | 0.938 |
| Glucose | **-0.003 (0.001)** | **0.046** | -0.001 (0.001) | 0.592 | -0.001 (0.001) | 0.877 |
| Pyruvate | -0.004 (0.002) | 0.197 | -0.003 (0.002) | 0.406 | -0.004 (0.003) | 0.314 |
| Acetate | **-0.004 (0.001)** | **0.003** | **-0.005 (0.001)** | **0.000** | **-0.004 (0.001)** | **0.006** |
| Creatinine | **-0.011 (0.002)** | **0.000** | **-0.008 (0.002)** | **0.000** | **-0.009 (0.002)** | **0.000** |
| Albumin | **0.008 (0.002)** | **0.000** | 0.003 (0.002) | 0.239 | 0.003 (0.002) | 0.256 |
| Glycoprotein Acetyls | **-0.013 (0.002)** | **0.000** | **-0.005 (0.002)** | **0.008** | **-0.007 (0.002)** | **0.000** |
| Phospholipids in Very Small VLDL | -0.001 (0.002) | 0.750 | -0.001 (0.002) | 0.815 | -0.002 (0.002) | 0.670 |
| Free Cholesterol to Total Lipids in Chylomicrons and Extremely Large VLDL percentage | 0.003 (0.002) | 0.117 | 0.001 (0.002) | 0.747 | 0.002 (0.002) | 0.670 |
| Cholesteryl Esters to Total Lipids in Small VLDL percentage | 0.001 (0.002) | 0.573 | -0.001 (0.002) | 0.815 | -0.001 (0.002) | 0.879 |
| Cholesteryl Esters to Total Lipids in Large LDL percentage | **0.008 (0.002)** | **0.000** | **0.006 (0.002)** | **0.005** | **0.006 (0.002)** | **0.012** |
| Cholesterol to Total Lipids in Medium LDL percentage | **0.011 (0.002)** | **0.000** | **0.006 (0.002)** | **0.000** | **0.005 (0.002)** | **0.009** |
| Phospholipids to Total Lipids in Small HDL percentage | 0.001 (0.002) | 0.573 | 0 (0.002) | 0.878 | 0 (0.002) | 0.938 |
| Metabolic signature | **-0.016 (0.002)** | **0.000** | **-0.006 (0.002)** | **0.000** | **-0.007 (0.002)** | **0.000** |
| **RPE** |  |  |  |  |  |  |
| Average Diameter for VLDL Particles | **-0.012 (0.002)** | **0.000** | **-0.011 (0.002)** | **0.000** | **-0.009 (0.002)** | **0.000** |
| Degree of Unsaturation | 0.007 (0.002) | 0.052 | 0.002 (0.002) | 0.530 | 0.001 (0.002) | 0.716 |
| Omega-3 Fatty Acids to Total Fatty Acids percentage | 0.001 (0.003) | 0.675 | -0.002 (0.003) | 0.587 | -0.001 (0.003) | 0.705 |
| Monounsaturated Fatty Acids to Total Fatty Acids percentage | -0.005 (0.002) | 0.115 | -0.003 (0.002) | 0.391 | -0.002 (0.002) | 0.611 |
| Linoleic Acid to Total Fatty Acids percentage | -0.002 (0.002) | 0.430 | -0.004 (0.002) | 0.187 | -0.005 (0.002) | 0.112 |
| Alanine | 0.005 (0.003) | 0.171 | 0.004 (0.003) | 0.264 | 0.005 (0.003) | 0.214 |
| Glutamine | 0.003 (0.003) | 0.290 | 0.004 (0.003) | 0.235 | 0.003 (0.003) | 0.403 |
| Glycine | 0.003 (0.002) | 0.325 | 0.004 (0.002) | 0.245 | 0.003 (0.003) | 0.403 |
| Histidine | **0.008 (0.003)** | **0.023** | **0.008 (0.003)** | **0.012** | **0.009 (0.003)** | **0.012** |
| Valine | 0.003 (0.002) | 0.382 | 0.002 (0.002) | 0.587 | 0.003 (0.002) | 0.403 |
| Tyrosine | **0.008 (0.002)** | **0.023** | **0.006 (0.002)** | **0.032** | **0.006 (0.002)** | **0.050** |
| Glucose | -0.001 (0.002) | 0.687 | -0.001 (0.002) | 0.587 | -0.001 (0.002) | 0.594 |
| Pyruvate | 0.003 (0.003) | 0.503 | 0.002 (0.003) | 0.587 | 0.002 (0.003) | 0.641 |
| Acetate | 0.004 (0.002) | 0.088 | 0.004 (0.002) | 0.073 | **0.005 (0.002)** | **0.050** |
| Creatinine | 0.005 (0.002) | 0.104 | 0.004 (0.002) | 0.187 | 0.004 (0.002) | 0.144 |
| Albumin | 0.005 (0.003) | 0.150 | **0.007 (0.003)** | **0.032** | **0.007 (0.003)** | **0.050** |
| Glycoprotein Acetyls | -0.003 (0.003) | 0.290 | -0.004 (0.002) | 0.264 | -0.003 (0.002) | 0.403 |
| Phospholipids in Very Small VLDL | -0.002 (0.003) | 0.544 | 0 (0.002) | 0.942 | 0 (0.003) | 0.859 |
| Free Cholesterol to Total Lipids in Chylomicrons and Extremely Large VLDL percentage | 0.005 (0.003) | 0.171 | 0.003 (0.003) | 0.335 | 0.003 (0.003) | 0.420 |
| Cholesteryl Esters to Total Lipids in Small VLDL percentage | 0.004 (0.003) | 0.274 | 0.003 (0.003) | 0.380 | 0.002 (0.003) | 0.556 |
| Cholesteryl Esters to Total Lipids in Large LDL percentage | -0.005 (0.002) | 0.104 | -0.004 (0.002) | 0.187 | -0.005 (0.003) | 0.179 |
| Cholesterol to Total Lipids in Medium LDL percentage | -0.003 (0.003) | 0.325 | -0.002 (0.002) | 0.526 | -0.003 (0.002) | 0.403 |
| Phospholipids to Total Lipids in Small HDL percentage | 0.006 (0.003) | 0.088 | **0.008 (0.003)** | **0.015** | **0.008 (0.003)** | **0.023** |
| Metabolic signature | -0.001 (0.003) | 0.677 | -0.001 (0.002) | 0.753 | 0 (0.002) | 0.974 |

Notes: The coefficient of linear regression, Beta (*β*); Standard Error (SE);

aModel 1 was adjusted for age and sex;

Model 2 was further adjusted for Townsend deprivation index, Ethnic, Current employment status, Smoking status, drinking status, BMI, Regular exercise and Cholesterol lowering medication;

Model 3 was further adjusted for Aspirin use, Hypertension, Diabetes mellitus, liver disease.

bRed bold font represents p-values adjusted by the Benjamini-Hochberg procedure less than 0.05.

## Table S6. Mediation proportion of single metabolite in the association of liver function with ISOSRPE

|  | **Estimate** | **95% CI** | ***P* value** |
| --- | --- | --- | --- |
|  | Average Diameter for VLDL Particles | |  | |
| ACME | 0.004 | (-0.004, 0.010) | 0.352 |
| ADE | -0.151 | (-0.267, -0.020) | 0.016 |
| Total Effect | -0.147 | (-0.261, -0.020) | 0.02 |
| Prop. Mediated | -0.025 | (-0.186, 0.040) | 0.364 |
|  | Degree of Unsaturation |  |  |
| ACME | -0.004 | (-0.016, 0.010) | 0.552 |
| ADE | -0.143 | (-0.258, -0.020) | 0.028 |
| Total Effect | -0.147 | (-0.263, -0.020) | 0.02 |
| Prop. Mediated | 0.023 | (-0.199, 0.220) | 0.572 |
|  | **Omega-3 Fatty Acids to Total Fatty Acids percentage** | | | |
| ACME | -0.005 | (-0.01, 0) | 0.024 |
| ADE | -0.142 | (-0.257, -0.020) | 0.028 |
| Total Effect | -0.147 | (-0.263, -0.020) | 0.02 |
| Prop. Mediated | **0.032** | **(0.003, 0.180)** | **0.044** |
|  | **Monounsaturated Fatty Acids to Total Fatty Acids percentage** | | | |
| ACME | -0.023 | (-0.038, -0.010) | 0.004 |
| ADE | -0.125 | (-0.241, 0.000) | 0.064 . |
| Total Effect | -0.147 | (-0.26, -0.020) | 0.02 |
| Prop. Mediated | **0.156** | **(0.041, 0.850)** | **0.024** |
|  | Linoleic Acid to Total Fatty Acids percentage | |  | |
| ACME | 0.003 | (-0.007, 0.010) | 0.510 |
| ADE | -0.150 | (-0.265, -0.020) | 0.020 |
| Total Effect | -0.147 | (-0.263, -0.020) | 0.020 |
| Prop. Mediated | -0.022 | (-0.31, 0.070) | 0.510 |
|  | Alanine |  |  |
| ACME | 0.002 | (-0.004, 0.010) | 0.550 |
| ADE | -0.149 | (-0.264, -0.020) | 0.020 |
| Total Effect | -0.147 | (-0.261, -0.020) | 0.020 |
| Prop. Mediated | -0.011 | (-0.116, 0.070) | 0.560 |
|  | Glutamine |  |  |
| ACME | 0.005 | (0.000, 0.010) | 0.044 |
| ADE | -0.152 | (-0.266, -0.030) | 0.016 |
| Total Effect | -0.147 | (-0.262, -0.020) | 0.020 |
| Prop. Mediated | -0.033 | (-0.219, 0.000) | 0.056 |
|  | Glycine |  |  |
| ACME | 0.001 | (-0.003, 0.010) | 0.560 |
| ADE | -0.148 | (-0.263, -0.020) | 0.020 |
| Total Effect | -0.147 | (-0.262, -0.020) | 0.020 |
| Prop. Mediated | -0.008 | (-0.112, 0.030) | 0.560 |
|  | Histidine |  |  |
| ACME | 0.000 | (-0.002, 0.000) | 0.820 |
| ADE | -0.147 | (-0.262, -0.020) | 0.020 |
| Total Effect | -0.147 | (-0.262, -0.020) | 0.020 |
| Prop. Mediated | -0.001 | (-0.028, 0.020) | 0.820 |
|  | **Valine** |  |  |
| ACME | -0.007 | (-0.013, 0.000) | 0.008 |
| ADE | -0.141 | (-0.256, -0.010) | 0.032 |
| Total Effect | -0.147 | (-0.261, -0.020) | 0.020 |
| Prop. Mediated | **0.044** | **(0.004, 0.290)** | **0.028** |
|  | Tyrosine |  |  |
| ACME | 0.000 | (-0.010, 0.010) | 0.950 |
| ADE | -0.147 | (-0.262, -0.020) | 0.020 |
| Total Effect | -0.147 | (-0.261, -0.020) | 0.020 |
| Prop. Mediated | 0.001 | (-0.108, 0.140) | 0.950 |
|  | Glucose |  |  |
| ACME | -0.003 | (-0.009, 0.000) | 0.340 |
| ADE | -0.145 | (-0.259, -0.020) | 0.020 |
| Total Effect | -0.147 | (-0.261, -0.020) | 0.020 |
| Prop. Mediated | 0.017 | (-0.028, 0.190) | 0.360 |
|  | Pyruvate |  |  |
| ACME | 0.002 | (-0.001, 0.010) | 0.230 |
| ADE | -0.149 | (-0.263, -0.020) | 0.020 |
| Total Effect | -0.147 | (-0.262, -0.020) | 0.020 |
| Prop. Mediated | -0.011 | (-0.094, 0.010) | 0.240 |
|  | Acetate |  |  |
| ACME | -0.005 | (-0.01, 0.000) | 0.004 |
| ADE | -0.142 | (-0.257, -0.010) | 0.028 |
| Total Effect | -0.147 | (-0.261, -0.020) | 0.020 |
| Prop. Mediated | 0.033 | (0.007, 0.210) | 0.024 |
|  | Creatinine |  |  |
| ACME | -0.004 | (-0.01, 0.000) | 0.084 |
| ADE | -0.143 | (-0.258, -0.020) | 0.020 |
| Total Effect | -0.147 | (-0.261, -0.020) | 0.020 |
| Prop. Mediated | 0.029 | (-0.007, 0.180) | 0.104 |
|  | Albumin |  |  |
| ACME | -0.003 | (-0.008, 0.000) | 0.120 |
| ADE | -0.144 | (-0.258, -0.020) | 0.020 |
| Total Effect | -0.147 | (-0.263, -0.020) | 0.020 |
| Prop. Mediated | 0.020 | (-0.008, 0.100) | 0.140 |
|  | **Glycoprotein Acetyls** |  |  |
| ACME | -0.024 | (-0.041, -0.010) | 0.004 |
| ADE | -0.123 | (-0.241, 0.010) | 0.064 . |
| Total Effect | -0.148 | (-0.260, -0.020) | 0.020 |
| Prop. Mediated | **0.164** | **(0.037, 0.930)** | **0.024** |
|  | Phospholipids in Very Small VLDL | |  | |
| ACME | -0.001 | (-0.011, 0.010) | 0.800 |
| ADE | -0.146 | (-0.262, -0.020) | 0.020 |
| Total Effect | -0.147 | (-0.261, -0.020) | 0.020 |
| Prop. Mediated | 0.008 | (-0.095, 0.230) | 0.800 |
|  | Free Cholesterol to Total Lipids in Chylomicrons and Extremely Large VLDL percentage | | | |
| ACME | -0.002 | (-0.009, 0.010) | 0.660 |
| ADE | -0.145 | (-0.26, -0.020) | 0.020 |
| Total Effect | -0.147 | (-0.263, -0.020) | 0.020 |
| Prop. Mediated | 0.011 | (-0.112, 0.110) | 0.680 |
|  | Cholesteryl Esters to Total Lipids in Small VLDL percentage | | | |
| ACME | 0.002 | (-0.004, 0.010) | 0.540 |
| ADE | -0.149 | (-0.263, -0.020) | 0.020 |
| Total Effect | -0.147 | (-0.262, -0.020) | 0.020 |
| Prop. Mediated | -0.010 | (-0.141, 0.030) | 0.540 |
|  | **Cholesteryl Esters to Total Lipids in Large LDL percentage** | | | |
| ACME | -0.005 | (-0.011, 0.000) | <0.001 |
| ADE | -0.142 | (-0.256, -0.020) | 0.028 |
| Total Effect | -0.147 | (-0.263, -0.020) | 0.020 |
| Prop. Mediated | **0.034** | **(0.006, 0.190)** | **0.020** |
|  | **Cholesterol to Total Lipids in Medium LDL percentage** | | | |
| ACME | -0.015 | (-0.025, -0.010) | <0.001 |
| ADE | -0.132 | (-0.246, -0.010) | 0.040 |
| Total Effect | -0.147 | (-0.263, -0.020) | 0.020 |
| Prop. Mediated | **0.099** | **(0.030, 0.560)** | **0.020** |
|  | Phospholipids to Total Lipids in Small HDL percentage | |  | |
| ACME | 0.000 | (-0.009, 0.010) | 0.970 |
| ADE | -0.147 | (-0.262, -0.020) | 0.020 |
| Total Effect | -0.147 | (-0.261, -0.020) | 0.020 |
| Prop. Mediated | 0.002 | (-0.096, 0.160) | 0.970 |

Notes: confidence intervals (CI); average causal mediation effects (ACME); average direct effects (ADE);

Model was adjusted for age and sex, Townsend deprivation index, ethnic, current employment status, smoking status, drinking status, BMI, regular exercise and cholesterol lowering medication.

## Table S7. Mediation proportion of signal metabolite in the association of liver function with RPE

|  | **Estimate** | **95% CI** | ***P* value** |
| --- | --- | --- | --- |
|  | **Average Diameter for VLDL Particles** | |  | |
| ACME | -0.013 | (-0.02, -0.010) | <0.001 |
| ADE | 0.113 | (0.028, 0.210) | 0.012 |
| Total Effect | 0.099 | (0.017, 0.190) | 0.020 |
| Prop. Mediated | **-0.132** | **(-0.641, -0.050)** | **0.020** |
|  | Degree of Unsaturation |  |  |
| ACME | -0.004 | (-0.013, 0.000) | 0.316 |
| ADE | 0.104 | (0.020, 0.200) | 0.016 |
| Total Effect | 0.100 | (0.015, 0.190) | 0.02 |
| Prop. Mediated | -0.043 | (-0.326, 0.06) | 0.328 |
|  | Omega-3 Fatty Acids to Total Fatty Acids percentage | |  | |
| ACME | 0.001 | (-0.002, 0.000) | 0.550 |
| ADE | 0.099 | (0.015, 0.190) | 0.020 |
| Total Effect | 0.099 | (0.015, 0.190) | 0.020 |
| Prop. Mediated | 0.009 | (-0.036, 0.060) | 0.570 |
|  | Monounsaturated Fatty Acids to Total Fatty Acids percentage | | | |
| ACME | -0.008 | (-0.019, 0.000) | 0.176 |
| ADE | 0.107 | (0.022, 0.200) | 0.016 |
| Total Effect | 0.099 | (0.017, 0.190) | 0.020 |
| Prop. Mediated | -0.078 | (-0.405, 0.040) | 0.196 |
|  | Linoleic Acid to Total Fatty Acids percentage | |  | |
| ACME | 0.006 | (-0.002, 0.010) | 0.104 |
| ADE | 0.093 | (0.010, 0.190) | 0.024 |
| Total Effect | 0.099 | (0.015, 0.190) | 0.020 |
| Prop. Mediated | 0.062 | (-0.021, 0.2800) | 0.124 |
|  | Alanine |  |  |
| ACME | 0.003 | (-0.001, 0.010) | 0.208 |
| ADE | 0.096 | (0.012, 0.190) | 0.024 |
| Total Effect | 0.099 | (0.016, 0.190) | 0.020 |
| Prop. Mediated | 0.028 | (-0.019, 0.180) | 0.220 |
|  | Glutamine |  |  |
| ACME | -0.003 | (-0.007, 0.000) | 0.092 |
| ADE | 0.102 | (0.019, 0.190) | 0.020 |
| Total Effect | 0.099 | (0.015, 0.190) | 0.020 |
| Prop. Mediated | -0.028 | (-0.153, 0.010) | 0.104 |
|  | Glycine |  |  |
| ACME | -0.002 | (-0.006, 0.000) | 0.120 |
| ADE | 0.102 | (0.018, 0.190) | 0.020 |
| Total Effect | 0.099 | (0.015, 0.190) | 0.020 |
| Prop. Mediated | -0.023 | (-0.129, 0.010) | 0.140 |
|  | Histidine |  |  |
| ACME | -0.002 | (-0.005, 0.000) | 0.120 |
| ADE | 0.101 | (0.018, 0.190) | 0.020 |
| Total Effect | 0.099 | (0.015, 0.190) | 0.020 |
| Prop. Mediated | -0.016 | (-0.088, 0.010) | 0.140 |
|  | Valine |  |  |
| ACME | 0.001 | (-0.003, 0.010) | 0.620 |
| ADE | 0.098 | (0.014, 0.190) | 0.020 |
| Total Effect | 0.099 | (0.016, 0.190) | 0.020 |
| Prop. Mediated | 0.010 | (-0.046, 0.100) | 0.610 |
|  | **Tyrosine** |  |  |
| ACME | 0.009 | (0.002, 0.020) | 0.020 |
| ADE | 0.091 | (0.007, 0.180) | 0.044 |
| Total Effect | 0.099 | (0.016, 0.1900) | 0.020 |
| Prop. Mediated | **0.082** | **(0.010, 0.420)** | **0.040** |
|  | Glucose |  |  |
| ACME | -0.002 | (-0.006, 0.00) | 0.470 |
| ADE | 0.101 | (0.017, 0.190) | 0.020 |
| Total Effect | 0.099 | (0.016, 0.190) | 0.020 |
| Prop. Mediated | -0.016 | (-0.112, 0.050) | 0.490 |
|  | Pyruvate |  |  |
| ACME | -0.001 | (-0.003, 0.000) | 0.580 |
| ADE | 0.100 | (0.016, 0.190) | 0.020 |
| Total Effect | 0.099 | (0.015, 0.190) | 0.020 |
| Prop. Mediated | -0.005 | (-0.045, 0.020) | 0.580 |
|  | Acetate |  |  |
| ACME | 0.002 | (0.000, 0.010) | 0.032 |
| ADE | 0.097 | (0.013, 0.190) | 0.020 |
| Total Effect | 0.099 | (0.015, 0.190) | 0.020 |
| Prop. Mediated | 0.020 | (0.000, 0.140) | 0.052 |
|  | Creatinine |  |  |
| ACME | 0.001 | (0.000, 0.000) | 0.150 |
| ADE | 0.098 | (0.015, 0.190) | 0.020 |
| Total Effect | 0.099 | (0.015, 0.190) | 0.020 |
| Prop. Mediated | 0.009 | (-0.003, 0.08) | 0.160 |
|  | Albumin |  |  |
| ACME | -0.004 | (-0.008, 0.000) | 0.004 |
| ADE | 0.104 | (0.020, 0.200) | 0.016 |
| Total Effect | 0.099 | (0.015, 0.190) | 0.020 |
| Prop. Mediated | -0.041 | (-0.197, -0.01) | 0.024 |
|  | Glycoprotein Acetyls |  |  |
| ACME | -0.011 | (-0.024, 0.000) | 0.076 |
| ADE | 0.110 | (0.025, 0.200) | 0.012 |
| Total Effect | 0.099 | (0.017, 0.190) | 0.020 |
| Prop. Mediated | -0.114 | (-0.562, 0.030) | 0.096 |
|  | Phospholipids in Very Small VLDL | |  | |
| ACME | -0.001 | (-0.008, 0.010) | 0.780 |
| ADE | 0.100 | (0.016, 0.190) | 0.020 |
| Total Effect | 0.099 | (0.016, 0.190) | 0.020 |
| Prop. Mediated | -0.012 | (-0.165, 0.120) | 0.800 |
|  | Free Cholesterol to Total Lipids in Chylomicrons and Extremely Large VLDL percentage | | | |
| ACME | -0.004 | (-0.009, 0.000) | 0.180 |
| ADE | 0.103 | (0.019, 0.200) | 0.016 |
| Total Effect | 0.099 | (0.015, 0.190) | 0.020 |
| Prop. Mediated | -0.035 | (-0.214, 0.020) | 0.192 |
|  | Cholesteryl Esters to Total Lipids in Small VLDL percentage | | | |
| ACME | -0.002 | (-0.006, 0.000) | 0.260 |
| ADE | 0.102 | (0.018, 0.190) | 0.020 |
| Total Effect | 0.099 | (0.015, 0.190) | 0.020 |
| Prop. Mediated | -0.021 | (-0.133, 0.020) | 0.270 |
|  | Cholesteryl Esters to Total Lipids in Large LDL percentage | |  | |
| ACME | 0.002 | (0.000, 0.010) | 0.092 |
| ADE | 0.097 | (0.014, 0.190) | 0.020 |
| Total Effect | 0.099 | (0.016, 0.190) | 0.020 |
| Prop. Mediated | 0.021 | (-0.005, 0.100) | 0.112 |
|  | Cholesterol to Total Lipids in Medium LDL percentage | |  | |
| ACME | 0.002 | (-0.004, 0.010) | 0.480 |
| ADE | 0.097 | (0.014, 0.190) | 0.020 |
| Total Effect | 0.099 | (0.015, 0.190) | 0.020 |
| Prop. Mediated | 0.025 | (-0.066, 0.150) | 0.500 |
|  | **Phospholipids to Total Lipids in Small HDL percentage** | | | |
| ACME | 0.010 | (0.003, 0.020) | 0.008 |
| ADE | 0.089 | (0.005, 0.180) | 0.044 |
| Total Effect | 0.099 | (0.016, 0.190) | 0.020 |
| Prop. Mediated | **0.096** | **(0.020, 0.480)** | **0.028** |

Notes: confidence intervals (CI); average causal mediation effects (ACME); average direct effects (ADE);

Model was adjusted for age and sex, Townsend deprivation index, ethnic, current employment status, smoking status, drinking status, BMI, regular exercise and cholesterol lowering medication.

## Table S8. Associations of liver function and retinal layer thickness in the sex and age subgroup in analytic sample 1

| **Retinal layer thickness** | **Model 1a** |  |  | **Model 2** |  |  | **Model 3** |  |  |
| --- | --- | --- | --- | --- | --- | --- | --- | --- | --- |
|  | **β** (**SE**) | ***P*-valueb** | **P for interaction** | **β** (**SE**) | ***P*-value** | **P for interaction** | **β** (**SE**) | ***P*-value** | **P for interaction** |
| **Female (n= 16434)** |  |  |  |  |  |  |  |  |  |
| ELMISOS | -0.032 (0.023) | 0.237 | 0.382 | 0.01 (0.023) | 0.928 | 0.425 | 0.015 (0.023) | 0.720 | 0.333 |
| INLELM | -0.139 (0.101) | 0.237 | 0.308 | -0.026 (0.101) | 0.928 | 0.252 | -0.028 (0.102) | 0.884 | 0.333 |
| RPE | 0.053 (0.046) | 0.294 | 0.382 | 0.038 (0.046) | 0.718 | 0.425 | 0.051 (0.047) | 0.553 | 0.403 |
| ISOSRPE | **-0.277 (0.064)** | **0.000** | 0.989 | -0.154 (0.065) | 0.119 | 0.749 | -0.18 (0.065) | 0.042 | 0.939 |
| GCIPL | -0.137 (0.087) | 0.237 | 0.764 | -0.092 (0.088) | 0.684 | 0.707 | -0.089 (0.089) | 0.553 | 0.939 |
| INL | -0.009 (0.036) | 0.811 | 0.764 | -0.003 (0.037) | 0.928 | 0.707 | -0.005 (0.037) | 0.884 | 0.514 |
| RNFL | **-0.204 (0.07)** | **0.014** | 0.382 | -0.13 (0.071) | 0.228 | 0.457 | -0.124 (0.072) | 0.294 | 0.403 |
| **Male (n= 14585)** |  |  |  |  |  |  |  |  |  |
| ELMISOS | **-0.086 (0.027)** | **0.002** | 0.382 | -0.053 (0.027) | 0.088 | 0.425 | -0.054 (0.027) | 0.086 | 0.333 |
| INLELM | **-0.394 (0.108)** | **0.000** | 0.308 | **-0.324 (0.108)** | **0.021** | 0.252 | **-0.308 (0.110)** | **0.035** | 0.333 |
| RPE | **0.154 (0.05)** | **0.004** | 0.382 | **0.127 (0.050)** | **0.039** | 0.425 | **0.131 (0.051)** | **0.035** | 0.403 |
| ISOSRPE | **-0.271 (0.069)** | **0.000** | 0.989 | **-0.162 (0.069)** | **0.044** | 0.749 | **-0.166 (0.070)** | **0.042** | 0.939 |
| GCIPL | -0.161 (0.095) | 0.125 | 0.764 | -0.105 (0.096) | 0.379 | 0.707 | -0.052 (0.097) | 0.690 | 0.939 |
| INL | 0.031 (0.04) | 0.443 | 0.764 | 0.018 (0.040) | 0.770 | 0.707 | 0.029 (0.041) | 0.665 | 0.514 |
| RNFL | -0.089 (0.071) | 0.249 | 0.382 | -0.001 (0.072) | 0.993 | 0.457 | 0.015 (0.073) | 0.836 | 0.403 |
| **Age <60 (n= 18849)** |  |  |  |  |  |  |  |  |  |
| ELMISOS | **-0.084 (0.023)** | **0.000** | 0.235 | -0.036 (0.023) | 0.154 | 0.404 | -0.036 (0.023) | 0.167 | 0.364 |
| INLELM | **-0.254 (0.094)** | **0.010** | 0.962 | -0.142 (0.094) | 0.154 | 0.960 | -0.129 (0.096) | 0.208 | 0.814 |
| RPE | **0.112 (0.047)** | **0.019** | 0.962 | 0.087 (0.047) | 0.110 | 0.960 | 0.107 (0.048) | 0.058 | 0.814 |
| ISOSRPE | **-0.301 (0.063)** | **0.000** | 0.962 | **-0.16 (0.063)** | **0.039** | 0.960 | **-0.172 (0.064)** | **0.025** | 0.814 |
| GCIPL | **-0.234 (0.082)** | **0.007** | 0.252 | **-0.191 (0.083)** | **0.049** | 0.404 | -0.162 (0.084) | 0.095 | 0.364 |
| INL | 0.01 (0.035) | 0.777 | 0.962 | 0.006 (0.035) | 0.865 | 0.960 | 0.010 (0.035) | 0.774 | 0.926 |
| RNFL | **-0.275 (0.064)** | **0.000** | **0.021** | **-0.198 (0.064)** | **0.014** | 0.056 | **-0.182 (0.065)** | **0.025** | 0.077 |
| **Age >=60 (n= 12170)** |  |  |  |  |  |  |  |  |  |
| ELMISOS | -0.022 (0.027) | 0.753 | 0.235 | 0.003 (0.027) | 0.913 | 0.404 | 0.008 (0.028) | 0.760 | 0.364 |
| INLELM | -0.256 (0.118) | 0.105 | 0.962 | -0.185 (0.118) | 0.273 | 0.960 | -0.189 (0.12) | 0.270 | 0.814 |
| RPE | 0.094 (0.047) | 0.107 | 0.962 | 0.083 (0.047) | 0.273 | 0.960 | 0.074 (0.048) | 0.270 | 0.814 |
| ISOSRPE | **-0.258 (0.071)** | **0.000** | 0.962 | -0.185 (0.071) | 0.063 | 0.960 | **-0.208 (0.072)** | **0.028** | 0.814 |
| GCIPL | -0.008 (0.103) | 0.937 | 0.252 | 0.053 (0.104) | 0.723 | 0.404 | 0.078 (0.105) | 0.643 | 0.364 |
| INL | 0.018 (0.043) | 0.825 | 0.962 | 0.021 (0.043) | 0.723 | 0.960 | 0.026 (0.044) | 0.645 | 0.926 |
| RNFL | 0.03 (0.081) | 0.825 | 0.021 | 0.110 (0.081) | 0.305 | 0.056 | 0.117 (0.082) | 0.270 | 0.077 |

Notes: The coefficient of linear regression, Beta (*β*); Standard Error (SE); retinal nerve fiber layer (RNFL), ganglion cell-inner plexiform layer (GCIPL), inner nuclear layer (INL), inner nuclear layer-external limiting membrane (INL-ELM), external limiting membrane-inner and outer photoreceptor segments (ELM-ISOS), inner and outer photoreceptor segments-retinal pigment epithelium (ISOS-RPE), and retinal pigment epithelium (RPE);

a Model 1 was adjusted for age and sex;

Model 2 was further adjusted for Townsend deprivation index, ethnic, current employment status, smoking status, drinking status, BMI, regular exercise;

Model 3 was further adjusted for best-corrected visual acuity (BCVA), intraocular pressure (IOP).

b Red bold font represents p-values adjusted by the Benjamini-Hochberg procedure less than 0.05.

## Table S9. Associations of liver function with retinal layer thickness after excluding liver disease in analytic sample 1

| **Retinal layer thickness** | **Model 1a** |  | **Model 2** |  | **Model 3** |  |
| --- | --- | --- | --- | --- | --- | --- |
|  | **β** (**SE**) | ***P*-valueb** | **β** (**SE**) | ***P*-value** | **β** (**SE**) | ***P*-value** |
| **Liver function** |  |  |  |  |  |  |
| ELMISOS | **-0.062 (0.018)** | **0.000** | -0.023 (0.018) | 0.260 | -0.022 (0.018) | 0.311 |
| INLELM | **-0.239 (0.075)** | **0.001** | -0.146 (0.075) | 0.119 | -0.134 (0.075) | 0.170 |
| RPE | **0.111 (0.034)** | **0.001** | **0.090 (0.035)** | **0.032** | **0.089 (0.035)** | **0.035** |
| ISOSRPE | **-0.267 (0.048)** | **0.000** | **-0.148 (0.048)** | **0.014** | **-0.142 (0.048)** | **0.021** |
| GCIPL | -0.125 (0.065) | 0.064 | -0.08 (0.066) | 0.260 | -0.062 (0.066) | 0.405 |
| INL | 0.017 (0.027) | 0.524 | 0.016 (0.028) | 0.570 | 0.017 (0.028) | 0.525 |
| RNFL | **-0.163 (0.051)** | **0.001** | -0.082 (0.051) | 0.187 | -0.077 (0.051) | 0.233 |
| **ALT** |  |  |  |  |  |  |
| ELMISOS | -0.068 (0.044) | 0.427 | -0.007 (0.044) | 0.983 | -0.011 (0.045) | 0.907 |
| INLELM | -0.063 (0.186) | 0.733 | 0.004 (0.185) | 0.983 | 0.022 (0.188) | 0.907 |
| RPE | 0.049 (0.085) | 0.662 | 0.041 (0.085) | 0.983 | 0.049 (0.086) | 0.907 |
| ISOSRPE | **-0.360 (0.119)** | **0.014** | -0.194 (0.119) | 0.721 | -0.236 (0.12) | 0.350 |
| GCIPL | -0.17 (0.161) | 0.511 | -0.097 (0.162) | 0.983 | -0.103 (0.165) | 0.907 |
| INL | 0.042 (0.068) | 0.662 | 0.021 (0.068) | 0.983 | 0.023 (0.069) | 0.907 |
| RNFL | -0.165 (0.126) | 0.443 | -0.054 (0.126) | 0.983 | -0.028 (0.128) | 0.907 |
| **AST** |  |  |  |  |  |  |
| ELMISOS | **-0.107 (0.038)** | **0.012** | -0.064 (0.038) | 0.210 | -0.057 (0.038) | 0.310 |
| INLELM | -0.015 (0.159) | 0.927 | 0.059 (0.158) | 0.775 | 0.099 (0.16) | 0.755 |
| RPE | 0.062 (0.073) | 0.640 | 0.043 (0.073) | 0.775 | 0.052 (0.074) | 0.755 |
| ISOSRPE | -0.076 (0.102) | 0.640 | 0.043 (0.101) | 0.775 | 0.012 (0.103) | 0.919 |
| GCIPL | **-0.474 (0.138)** | **0.007** | **-0.427 (0.139)** | **0.014** | **-0.397 (0.14)** | **0.035** |
| INL | -0.007 (0.058) | 0.927 | -0.017 (0.058) | 0.775 | -0.006 (0.059) | 0.919 |
| RNFL | **-0.309 (0.108)** | **0.012** | -0.231 (0.108) | 0.112 | -0.215 (0.109) | 0.172 |
| **TBIL** |  |  |  |  |  |  |
| ELMISOS | -0.002 (0.027) | 0.938 | 0.015 (0.026) | 0.815 | 0.016 (0.027) | 0.780 |
| INLELM | -0.256 (0.112) | 0.077 | -0.183 (0.111) | 0.229 | -0.187 (0.112) | 0.222 |
| RPE | 0.104 (0.051) | 0.100 | 0.086 (0.051) | 0.229 | 0.094 (0.052) | 0.222 |
| ISOSRPE | **-0.194 (0.072)** | **0.049** | -0.135 (0.071) | 0.229 | -0.149 (0.072) | 0.222 |
| GCIPL | -0.018 (0.097) | 0.938 | 0.006 (0.097) | 0.949 | 0.021 (0.098) | 0.866 |
| INL | 0.023 (0.041) | 0.799 | 0.029 (0.041) | 0.815 | 0.024 (0.041) | 0.780 |
| RNFL | -0.051 (0.076) | 0.799 | -0.009 (0.075) | 0.949 | 0.013 (0.077) | 0.866 |
| **GGT** |  |  |  |  |  |  |
| ELMISOS | **-0.141 (0.029)** | **0.000** | **-0.091 (0.029)** | **0.007** | **-0.094 (0.029)** | **0.007** |
| INLELM | **-0.285 (0.122)** | **0.033** | **-0.238 (0.122)** | **0.088** | **-0.238 (0.124)** | **0.111** |
| RPE | 0.090 (0.056) | 0.148 | 0.082 (0.056) | 0.199 | 0.100 (0.057) | 0.111 |
| ISOSRPE | -0.048 (0.078) | 0.632 | 0.081 (0.078) | 0.348 | 0.071 (0.079) | 0.429 |
| GCIPL | **-0.394 (0.106)** | **0.000** | **-0.344 (0.107)** | **0.007** | **-0.286 (0.108)** | **0.028** |
| INL | -0.011 (0.045) | 0.812 | -0.026 (0.045) | 0.568 | -0.017 (0.046) | 0.708 |
| RNFL | **-0.264 (0.083)** | **0.002** | **-0.181 (0.083)** | **0.068** | -0.151 (0.084) | 0.111 |
| **ALP** |  |  |  |  |  |  |
| ELMISOS | **-0.076 (0.024)** | **0.004** | -0.033 (0.024) | 0.292 | -0.035 (0.024) | 0.261 |
| INLELM | **-0.238 (0.101)** | **0.032** | -0.123 (0.100) | 0.292 | -0.116 (0.102) | 0.299 |
| RPE | 0.079 (0.046) | 0.122 | 0.053 (0.046) | 0.292 | 0.058 (0.047) | 0.299 |
| ISOSRPE | **-0.341 (0.064)** | **0.000** | **-0.202 (0.064)** | **0.014** | **-0.212 (0.065)** | **0.007** |
| GCIPL | -0.09 (0.087) | 0.301 | -0.043 (0.088) | 0.624 | -0.018 (0.089) | 0.842 |
| INL | 0.053 (0.037) | 0.172 | 0.053 (0.037) | 0.292 | 0.059 (0.037) | 0.261 |
| RNFL | **-0.208 (0.068)** | **0.005** | -0.118 (0.068) | 0.292 | -0.133 (0.069) | 0.196 |
| **TP** |  |  |  |  |  |  |
| ELMISOS | 0.131 (0.089) | 0.331 | 0.128 (0.089) | 0.345 | 0.121 (0.09) | 0.415 |
| INLELM | 0.397 (0.375) | 0.406 | 0.363 (0.372) | 0.459 | 0.303 (0.377) | 0.550 |
| RPE | -0.054 (0.172) | 0.754 | -0.032 (0.171) | 0.851 | -0.035 (0.173) | 0.841 |
| ISOSRPE | -0.473 (0.240) | 0.172 | -0.508 (0.239) | 0.140 | -0.52 (0.241) | 0.172 |
| GCIPL | 0.396 (0.326) | 0.394 | 0.405 (0.326) | 0.376 | 0.280 (0.330) | 0.550 |
| INL | -0.073 (0.137) | 0.691 | -0.075 (0.137) | 0.683 | -0.100 (0.139) | 0.550 |
| RNFL | 0.533 (0.254) | 0.172 | 0.520 (0.253) | 0.140 | 0.506 (0.257) | 0.172 |
| **ALB** |  |  |  |  |  |  |
| ELMISOS | -0.228 (0.356) | 0.983 | -0.179 (0.354) | 0.963 | -0.18 (0.354) | 0.951 |
| INLELM | 0.032 (1.502) | 0.983 | 0.251 (1.488) | 0.963 | 0.207 (1.488) | 0.951 |
| RPE | -0.334 (0.689) | 0.983 | -0.333 (0.686) | 0.963 | -0.32 (0.685) | 0.951 |
| ISOSRPE | -0.137 (0.962) | 0.983 | 0.045 (0.955) | 0.963 | 0.058 (0.953) | 0.951 |
| GCIPL | 0.235 (1.307) | 0.983 | 0.334 (1.306) | 0.963 | 0.346 (1.303) | 0.951 |
| INL | 0.301 (0.548) | 0.983 | 0.295 (0.547) | 0.963 | 0.285 (0.548) | 0.951 |
| RNFL | 0.264 (1.018) | 0.983 | 0.373 (1.014) | 0.963 | 0.411 (1.014) | 0.951 |

Notes: The coefficient of linear regression, Beta (*β*); Standard Error (SE) ; alanine transaminase (ALT), Aspartate transaminase (AST), Total bilirubin (TBIL), Gamma glutamyltransferase (GGT), Alkaline phosphatase (ALP), Total Protein (TP), Albumin (ALB); retinal nerve fiber layer (RNFL), ganglion cell-inner plexiform layer (GCIPL), inner nuclear layer (INL), inner nuclear layer-external limiting membrane (INL-ELM), external limiting membrane-inner and outer photoreceptor segments (ELM-ISOS), inner and outer photoreceptor segments-retinal pigment epithelium (ISOS-RPE), and retinal pigment epithelium (RPE);

aModel 1 was adjusted for age,sex;

Model 2 was further adjusted for Townsend deprivation index, ethnic, current employment status, smoking status, drinking status, BMI, regular exercise;

Model 3 was further adjusted for best-corrected visual acuity (BCVA), intraocular pressure (IOP).

b Red bold font represents p-values adjusted by the Benjamini-Hochberg procedure less than 0.05.

## Table S10. Associations of liver function with retinal layer thickness in analytic sample 1

| **Retinal layer thickness** | **Model 4** |  |
| --- | --- | --- |
|  | **β** (**SE**) | ***P*-value** |
| **Liver function** |  |  |
| ELMISOS | -0.02 (0.018) | 0.343 |
| INLELM | -0.121 (0.074) | 0.238 |
| RPE | **0.084 (0.034)** | **0.049** |
| ISOSRPE | **-0.14 (0.047)** | **0.021** |
| GCIPL | -0.053 (0.065) | 0.481 |
| INL | 0.019 (0.027) | 0.493 |
| RNFL | -0.066 (0.05) | 0.331 |
| **ALT** |  |  |
| ELMISOS | 0 (0.043) | 0.997 |
| INLELM | 0.005 (0.18) | 0.997 |
| RPE | 0.01 (0.083) | 0.997 |
| ISOSRPE | -0.176 (0.116) | 0.896 |
| GCIPL | -0.097 (0.158) | 0.997 |
| INL | 0.014 (0.066) | 0.997 |
| RNFL | -0.033 (0.123) | 0.997 |
| **AST** |  |  |
| ELMISOS | -0.063 (0.036) | 0.201 |
| INLELM | 0.107 (0.154) | 0.815 |
| RPE | 0.037 (0.071) | 0.815 |
| ISOSRPE | 0.023 (0.098) | 0.815 |
| GCIPL | **-0.402 (0.135)** | **0.021** |
| INL | -0.018 (0.056) | 0.815 |
| RNFL | -0.195 (0.105) | 0.201 |
| **TBIL** |  |  |
| ELMISOS | 0.015 (0.026) | 0.795 |
| INLELM | -0.16 (0.109) | 0.331 |
| RPE | 0.094 (0.05) | 0.214 |
| ISOSRPE | -0.14 (0.07) | 0.214 |
| GCIPL | 0.037 (0.096) | 0.816 |
| INL | 0.04 (0.04) | 0.551 |
| RNFL | 0.014 (0.074) | 0.848 |
| **GGT** |  |  |
| ELMISOS | **-0.085 (0.028)** | **0.021** |
| INLELM | -0.225 (0.119) | 0.103 |
| RPE | 0.056 (0.055) | 0.361 |
| ISOSRPE | 0.092 (0.076) | 0.318 |
| GCIPL | **-0.275 (0.104)** | **0.028** |
| INL | -0.028 (0.044) | 0.528 |
| RNFL | **-0.171 (0.081)** | **0.084** |
| **ALP** |  |  |
| ELMISOS | -0.029 (0.023) | 0.343 |
| INLELM | -0.114 (0.098) | 0.343 |
| RPE | 0.037 (0.045) | 0.482 |
| ISOSRPE | **-0.193 (0.063)** | **0.014** |
| GCIPL | -0.042 (0.086) | 0.623 |
| INL | 0.054 (0.036) | 0.313 |
| RNFL | -0.102 (0.067) | 0.313 |
| **TP** |  |  |
| ELMISOS | 0.152 (0.087) | 0.184 |
| INLELM | 0.368 (0.364) | 0.438 |
| RPE | -0.03 (0.168) | 0.857 |
| ISOSRPE | -0.451 (0.234) | 0.184 |
| GCIPL | 0.423 (0.320) | 0.326 |
| INL | -0.096 (0.134) | 0.550 |
| RNFL | 0.475 (0.249) | 0.184 |
| **ALB** |  |  |
| ELMISOS | -0.227 (0.334) | 0.978 |
| INLELM | 0.038 (1.407) | 0.978 |
| RPE | -0.512 (0.648) | 0.978 |
| ISOSRPE | 0.586 (0.902) | 0.978 |
| GCIPL | -0.042 (1.234) | 0.978 |
| INL | 0.172 (0.517) | 0.978 |
| RNFL | 0.123 (0.961) | 0.978 |

Notes: The coefficient of linear regression, Beta (*β*); Standard Error (SE) ; alanine transaminase (ALT), Aspartate transaminase (AST), Total bilirubin (TBIL), Gamma glutamyltransferase (GGT), Alkaline phosphatase (ALP), Total Protein (TP), Albumin (ALB); retinal nerve fiber layer (RNFL), ganglion cell-inner plexiform layer (GCIPL), inner nuclear layer (INL), inner nuclear layer-external limiting membrane (INL-ELM), external limiting membrane-inner and outer photoreceptor segments (ELM-ISOS), inner and outer photoreceptor segments-retinal pigment epithelium (ISOS-RPE), and retinal pigment epithelium (RPE);

Model 4 was further adjusted for aspirin use, hypertension, diabetes mellitus, liver disease.

P-values were adjusted by the Benjamini-Hochberg procedure.

## Table S11. Mediation proportion of metabolic signature in the association of liver function with ISOSRPE in the age and sex subgroup

|  | **Estimate** | **95% CI** | ***P*-value** |
| --- | --- | --- | --- |
| **Female** |  |  |  |
| ACME | -0.036 | (-0.079, 0.010) | 0.084 |
| ADE | -0.081 | (-0.271, 0.090) | 0.360 |
| Total Effect | -0.117 | (-0.298, 0.050) | 0.164 |
| Prop. Mediated | 0.258 | (-1.741, 3.620) | 0.240 |
| **Male** |  |  |  |
| ACME | -0.048 | (-0.082, -0.010) | <2e-16 |
| ADE | -0.160 | (-0.364, 0.020) | 0.104 |
| Total Effect | -0.207 | (-0.402, -0.030) | 0.024 |
| Prop. Mediated | **0.231** | **(0.039, 1.140)** | **0.024** |
|  |  |  |  |
| **age <60** |  |  |  |
| ACME | -0.035 | (-0.072, 0.000) | 0.064 |
| ADE | -0.164 | (-0.325, 0.020) | 0.076 |
| Total Effect | -0.199 | (-0.350, -0.030) | 0.020 |
| Prop. Mediated | 0.171 | (-0.014, 1.040) | 0.076 |
| **age>=60** |  |  |  |
| ACME | -0.052 | (-0.088, -0.020) | 0.004 |
| ADE | -0.061 | (-0.237, 0.130) | 0.488 |
| Total Effect | -0.113 | (-0.280, 0.070) | 0.232 |
| Prop. Mediated | 0.350 | (-3.672, 4.550) | 0.236 |

Notes: confidence intervals (CI); average causal mediation effects (ACME); average direct effects (ADE);

Model was adjusted for age and sex, Townsend deprivation index, ethnic, current employment status, smoking status, drinking status, BMI, regular exercise and cholesterol lowering medication.

## Table S12. Mediation proportion of metabolic signature in the association of liver function with RNFL

|  | **Estimate** | **95%CI** | **P value** |
| --- | --- | --- | --- |
| ACME | -0.042 | (-0.071, -0.010) | 0.004 |
| ADE | -0.120 | (-0.248, 0.020) | 0.116 |
| Total Effect | -0.162 | (-0.282, -0.030) | 0.016 |
| Prop. Mediated | **0.258** | **(0.081, 1.310)** | **0.020** |

Notes: confidence intervals (CI); average causal mediation effects (ACME); average direct effects (ADE);

Model was adjusted for age and sex, Townsend deprivation index, ethnic, current employment status, smoking status, drinking status, BMI, regular exercise and cholesterol lowering medication.

## Table S13. Mediation proportion of signal metabolic in the association of liver function with RNFL

|  | **Estimate** | **95% CI** | **P value** |
| --- | --- | --- | --- |
|  | **Average Diameter for VLDL Particles** | | |
| ACME | 0.003 | (-0.006, 0.010) | 0.508 |
| ADE | -0.164 | (-0.288, -0.030) | 0.016 |
| Total Effect | -0.161 | (-0.284, -0.030) | 0.020 |
| Prop. Mediated | -0.017 | (-0.147, 0.060) | 0.520 |
|  | **Degree of Unsaturation** | |  |
| ACME | -0.013 | (-0.027, 0.000) | 0.032 |
| ADE | -0.148 | (-0.271, -0.010) | 0.036 |
| Total Effect | -0.161 | (-0.285, -0.020) | 0.016 |
| Prop. Mediated | **0.082** | **(0.002, 0.450)** | **0.048** |
|  | Omega-3 Fatty Acids to Total Fatty Acids percentage | | |
| ACME | -0.003 | (-0.008, 0.000) | 0.212 |
| ADE | -0.158 | (-0.281, -0.020) | 0.020 |
| Total Effect | -0.161 | (-0.285, -0.020) | 0.016 |
| Prop. Mediated | 0.016 | (-0.02, 0.100) | 0.228 |
|  | Monounsaturated Fatty Acids to Total Fatty Acids percentage | | |
| ACME | -0.006 | (-0.022, 0.010) | 0.488 |
| ADE | -0.156 | (-0.281, -0.020) | 0.024 |
| Total Effect | -0.162 | (-0.282, -0.030) | 0.016 |
| Prop. Mediated | 0.033 | (-0.104, 0.340) | 0.496 |
|  | **Linoleic Acid to Total Fatty Acids percentage** | | |
| ACME | -0.014 | (-0.026, 0.000) | 0.016 |
| ADE | -0.148 | (-0.27, -0.010) | 0.032 |
| Total Effect | -0.161 | (-0.286, -0.020) | 0.016 |
| Prop. Mediated | **0.084** | **(0.015, 0.450)** | **0.032** |
|  | Alanine |  |  |
| ACME | -0.003 | (-0.01, 0.000) | 0.440 |
| ADE | -0.159 | (-0.282, -0.020) | 0.020 |
| Total Effect | -0.161 | (-0.284, -0.030) | 0.020 |
| Prop. Mediated | 0.015 | (-0.033, 0.170) | 0.440 |
|  | Glutamine |  |  |
| ACME | 0.007 | (0.002, 0.010) | 0.000 |
| ADE | -0.168 | (-0.291, -0.030) | 0.012 |
| Total Effect | -0.161 | (-0.284, -0.020) | 0.016 |
| Prop. Mediated | -0.042 | (-0.235, -0.010) | 0.016 |
|  | Glycine |  |  |
| ACME | -0.003 | (-0.008, 0.000) | 0.224 |
| ADE | -0.159 | (-0.281, -0.020) | 0.020 |
| Total Effect | -0.161 | (-0.285, -0.020) | 0.016 |
| Prop. Mediated | 0.015 | (-0.023, 0.090) | 0.240 |
|  | Histidine |  |  |
| ACME | 0.000 | (-0.001, 0.000) | 0.652 |
| ADE | -0.162 | (-0.285, -0.030) | 0.016 |
| Total Effect | -0.161 | (-0.285, -0.020) | 0.016 |
| Prop. Mediated | -0.002 | (-0.032, 0.010) | 0.652 |
|  | Valine |  |  |
| ACME | 0.000 | (-0.006, 0.010) | 0.960 |
| ADE | -0.162 | (-0.285, -0.020) | 0.016 |
| Total Effect | -0.161 | (-0.284, -0.030) | 0.020 |
| Prop. Mediated | -0.001 | (-0.064, 0.080) | 0.964 |
|  | **Tyrosine** |  |  |
| ACME | -0.012 | (-0.023, 0.000) | 0.020 |
| ADE | -0.150 | (-0.273, -0.010) | 0.036 |
| Total Effect | -0.162 | (-0.283, -0.030) | 0.012 |
| Prop. Mediated | **0.072** | **(0.006, 0.510)** | **0.032** |
|  | Glucose |  |  |
| ACME | -0.010 | (-0.018, 0.000) | 0.000 |
| ADE | -0.151 | (-0.275, -0.010) | 0.028 |
| Total Effect | -0.162 | (-0.283, -0.030) | 0.016 |
| Prop. Mediated | 0.063 | (0.019, 0.370) | 0.016 |
|  | Pyruvate |  |  |
| ACME | -0.003 | (-0.008, 0.000) | 0.040 |
| ADE | -0.158 | (-0.281, -0.020) | 0.020 |
| Total Effect | -0.161 | (-0.285, -0.020) | 0.016 |
| Prop. Mediated | 0.018 | (0.000, 0.100) | 0.056 |
|  | Acetate |  |  |
| ACME | -0.001 | (-0.005, 0.000) | 0.432 |
| ADE | -0.160 | (-0.283, -0.020) | 0.020 |
| Total Effect | -0.161 | (-0.284, -0.030) | 0.016 |
| Prop. Mediated | 0.006 | (-0.014, 0.070) | 0.432 |
|  | Creatinine |  |  |
| ACME | 0.001 | (-0.001, 0.000) | 0.488 |
| ADE | -0.162 | (-0.285, -0.030) | 0.016 |
| Total Effect | -0.161 | (-0.284, -0.030) | 0.020 |
| Prop. Mediated | -0.003 | (-0.038, 0.010) | 0.500 |
|  | Albumin |  |  |
| ACME | 0.002 | (-0.003, 0.010) | 0.488 |
| ADE | -0.163 | (-0.286, -0.030) | 0.016 |
| Total Effect | -0.161 | (-0.285, -0.020) | 0.016 |
| Prop. Mediated | -0.010 | (-0.113, 0.020) | 0.488 |
|  | Glycoprotein Acetyls | |  |
| ACME | -0.009 | (-0.027, 0.010) | 0.352 |
| ADE | -0.152 | (-0.278, -0.010) | 0.028 |
| Total Effect | -0.162 | (-0.281, -0.030) | 0.012 |
| Prop. Mediated | 0.053 | (-0.075, 0.490) | 0.356 |
|  | Phospholipids in Very Small VLDL | |  |
| ACME | 0.004 | (-0.007, 0.020) | 0.504 |
| ADE | -0.166 | (-0.29, -0.030) | 0.016 |
| Total Effect | -0.162 | (-0.283, -0.030) | 0.016 |
| Prop. Mediated | -0.023 | (-0.184, 0.100) | 0.520 |
|  | Free Cholesterol to Total Lipids in Chylomicrons and Extremely Large VLDL percentage | | |
| ACME | 0.002 | (-0.006, 0.010) | 0.588 |
| ADE | -0.163 | (-0.286, -0.030) | 0.016 |
| Total Effect | -0.161 | (-0.285, -0.020) | 0.016 |
| Prop. Mediated | -0.011 | (-0.185, 0.050) | 0.588 |
|  | **Cholesteryl Esters to Total Lipids in Small VLDL percentage** | | |
| ACME | -0.007 | (-0.014, 0.000) | 0.012 |
| ADE | -0.154 | (-0.277, -0.020) | 0.028 |
| Total Effect | -0.161 | (-0.285, -0.020) | 0.016 |
| Prop. Mediated | **0.043** | **(0.007, 0.240)** | **0.028** |
|  | Cholesteryl Esters to Total Lipids in Large LDL percentage | | |
| ACME | -0.001 | (-0.006, 0.000) | 0.428 |
| ADE | -0.160 | (-0.283, -0.020) | 0.020 |
| Total Effect | -0.161 | (-0.285, -0.020) | 0.016 |
| Prop. Mediated | 0.007 | (-0.029, 0.060) | 0.436 |
|  | **Cholesterol to Total Lipids in Medium LDL percentage** | | |
| ACME | -0.011 | (-0.021, 0.000) | 0.020 |
| ADE | -0.151 | (-0.273, -0.020) | 0.028 |
| Total Effect | -0.161 | (-0.286, -0.020) | 0.016 |
| Prop. Mediated | **0.064** | **(0.006, 0.350)** | **0.036** |
|  | **Phospholipids to Total Lipids in Small HDL percentage** | | |
| ACME | -0.015 | (-0.026, -0.010) | 0.000 |
| ADE | -0.146 | (-0.27, -0.010) | 0.040 |
| Total Effect | -0.162 | (-0.283, -0.030) | 0.012 |
| Prop. Mediated | **0.094** | **(0.028, 0.570)** | **0.012** |

Notes: confidence intervals (CI); average causal mediation effects (ACME); average direct effects (ADE);

Model was adjusted for age and sex, Townsend deprivation index, ethnic, current employment status, smoking status, drinking status, BMI, regular exercise and cholesterol lowering medication.

## Table S14. Mediation proportion of metabolic signature in the association of liver function with RNFL in the age and sex subgroup

|  | **Estimate** | **95% CI** | ***P* value** |
| --- | --- | --- | --- |
| **Female** |  |  |  |
| ACME | -0.064 | (-0.112, -0.020) | 0.004 |
| ADE | -0.150 | (-0.361, 0.040) | 0.120 |
| Total Effect | -0.215 | (-0.414, -0.030) | 0.016 |
| Prop. Mediated | **0.302** | **(0.077, 1.540)** | **0.020** |
| **Male** |  |  |  |
| ACME | -0.023 | (-0.058, 0.010) | 0.160 |
| ADE | -0.088 | (-0.3, 0.100) | 0.380 |
| Total Effect | -0.111 | (-0.312, 0.070) | 0.260 |
| Prop. Mediated | 0.149 | (-2.951, 1.630) | 0.400 |
| **age <60** |  |  |  |
| ACME | -0.042 | (-0.081, -0.010) | 0.020 |
| ADE | -0.180 | (-0.345, 0.000) | 0.060 |
| Total Effect | -0.222 | (-0.377, -0.050) | 0.012 |
| Prop. Mediated | **0.188** | **(0.014, 0.930)** | **0.032** |
| **age>=60** |  |  |  |
| ACME | -0.042 | (-0.082, 0.000) | 0.052 |
| ADE | -0.019 | (-0.222, 0.200) | 0.848 |
| Total Effect | -0.061 | (-0.253, 0.160) | 0.544 |
| Prop. Mediated | 0.221 | (-4.757, 5.260) | 0.572 |

Notes: confidence intervals (CI); average causal mediation effects (ACME); average direct effects (ADE);

Model was adjusted for age and sex, Townsend deprivation index, ethnic, current employment status, smoking status, drinking status, BMI, regular exercise and cholesterol lowering medication.
